1  
2  
3  
4  
5  
6  
7  
8  
9  
10  
11  
12  
13  
14  
15  
16  
17  
18  
19  
20  
21

***Nucleolin is essential for rabbit hemorrhagic disease virus replication by providing a physical link in replication complex formation***

Jie Zhu<sup>1</sup>, Qihong Miao<sup>1, 2</sup>, Hongyuan Guo<sup>1</sup>, Ruibin Qi<sup>1</sup>, Aoxing Tang<sup>1</sup>, Dandan Dong<sup>1</sup>,  
Jingyu Tang<sup>1</sup>, Guangzhi Tong<sup>1\*</sup>, Guangqing Liu<sup>1\*</sup>

<sup>1</sup> Shanghai Veterinary Research Institute, Chinese Academy of Agricultural Sciences, Shanghai, 200241, China;

<sup>2</sup> Laboratory of Virology, Wageningen University and Research, Wageningen, 6708 PB, The Netherlands;

\*Corresponding author

E-mail: liugq@shvri.ac.cn (GL); gztong@shvri.ac.cn (GT)

## 22 **Abstract**

23 Rabbit hemorrhagic disease virus (RHDV) is an important member of the *Caliciviridae*  
24 family and cannot be propagated *in vitro*, which has greatly impeded progress of  
25 investigating its replication mechanism. Construction of an RHDV replicon system has  
26 recently provided a platform for exploring RHDV replication in host cells. Here, aided by this  
27 replicon system and using two-step affinity purification, we purified the RHDV replicase and  
28 identified its associated host factors. We identified rabbit nucleolin (NCL) as a physical link  
29 required for the formation of RHDV replication complexes (RCs), by mediating the  
30 interaction between other host proteins and the viral RNA replicase, RNA-dependent RNA  
31 polymerase (RdRp). We found that RHDV RdRp uses an amino acid (aa) region spanning  
32 residues 448–478 to directly interact with NCL’s RNA-recognition motif 2. We also found  
33 that the viral p16 protein uses a highly conserved region (<sup>35</sup>Cys–Ile–Arg–Ala<sup>38</sup> or CIRA  
34 motif) to specifically bind the N-terminal region of NCL (aa 1–110) and that RHDV p23 uses  
35 a specific domain (aa 90–145) to bind NCL’s RNA-recognition motif 1. Disrupting these  
36 protein–protein interactions severely weakened viral replication. Furthermore, NCL  
37 overexpression or knockdown significantly increased or severely impaired, respectively,  
38 RHDV replication. Collectively, these results indicate that the host protein NCL is essential  
39 for RHDV replication and plays a key role in the formation of RHDV RCs. The mechanisms  
40 by which NCL promotes viral replicase assembly reported here shed light on viral RC  
41 biogenesis and may inform antiviral therapies.

42

43

44

45

## 46 **Author summary**

47 Rabbit hemorrhagic disease virus (RHDV) is the causative agent of highly contagious  
48 and lethal hemorrhagic disease in the European rabbit, but the host factors involved in RHDV  
49 replication remain poorly understood. In the present study, we isolated RHDV replication  
50 complex (RC) for the first time and identified its main components. We found that nucleolin  
51 (NCL) plays a key role in the formation of the RHDV RC. NCL not only interacts with viral  
52 replicase (RdRp), it also specifically binds to other important host factors. In addition, we  
53 proved that NCL is necessary for RHDV replication because the level of RHDV replication is  
54 significantly affected by knocking down the NCL gene in cells. Together, our data suggest  
55 that RHDV completes its replication by hijacking NCL to recruit other viral proteins and host  
56 factors, thereby assembling the RC of RHDV.

## 57 **Introduction**

58 Rabbit hemorrhagic disease virus (RHDV) is the causative agent of rabbit hemorrhagic  
59 disease (RHD), which primarily infects the wild and domestic European rabbit (*Oryctolagus*  
60 *cuniculus*) [1] and is characterized by liver degeneration, diffuse hemorrhaging and high  
61 mortality [2,3]. However, the molecular mechanisms responsible for RHDV replication  
62 remain poorly understood, mainly due to the lack of a robust cell culture system for  
63 propagation of the virus.

64 RHDV is a nonenveloped positive-sense single-stranded RNA virus, which belongs to the  
65 family *Caliciviridae*, genus *Lagovirus*. RHDV virions contain the genomic RNA (gRNA) and  
66 an additional 2.2 kb of subgenomic RNA (sgRNA), which is collinear with the 3' end of the  
67 gRNA [1]. The gRNA of RHDV consists of a positive-sense single-stranded molecule of  
68 7,437 nucleotides with a virus-encoded protein, VPg, which is covalently attached to its 5'  
69 end [4,5]. The gRNA also contains two slightly overlapping open reading frames (ORFs) of 7

70 kb (ORF1) and 351 nucleotides (ORF2). ORF1 is translated into a large polyprotein that is  
71 cleaved into the major structural protein VP60, the capsid protein, and seven nonstructural  
72 proteins: p16, p23, helicase, p29, VPg, protease, and RNA-dependent RNA polymerase  
73 (RdRp). ORF2 encodes the minor structural protein VP10 [6-8]. The sgRNA, which only  
74 encodes VP60 and VP10, usually contributes to the production of high levels of products  
75 required during intermediate and late stages of infection [9]. Flanking the coding regions of  
76 RHDV is a 5' terminal noncoding region of nine nucleotides and a 3' terminal noncoding  
77 region of 59 nucleotides [8].

78 The function of some of the nonstructural proteins encoded by the genome of  
79 caliciviruses has been identified and/or predicted by relying on previous knowledge gathered  
80 from members of the closely related *Picornaviridae* family. For RHDV, two nonstructural  
81 proteins might be involved in the replication of viral RNA, a helicase and an RdRp, and a  
82 protease is involved in the autoproteolytic processing of the large viral polyprotein encoded  
83 by ORF1 [7,10,11]. The genome-binding protein VPg is covalently linked to both genomic  
84 and subgenomic RHDV RNAs at the 5' end. Our previous study suggested that the VPg  
85 protein serves as a novel cap substitute during the initiation of RHDV translation [5];  
86 however, the precise function of the RHDV nonstructural proteins (p16, p23, and p29)  
87 remains unclear.

88 Following attachment of RHDV to the cell surface, internalization and desencapsidation  
89 occur, leading to release of the viral genome into the cytoplasm of the host cell. The virus life  
90 cycle then proceeds to translation of the polyprotein precursor encoded by the viral genome  
91 through interaction with the host cellular machinery. The gRNA and the sgRNA covalently-  
92 linked VPg use the cellular translation machinery, positioning the ribosome at the start codon  
93 AUG without ribosome scanning and initiating translation. Posttranslational proteolytic  
94 processing by the viral gRNA encoded protease cleaves the polyprotein precursor into the

95 mature nonstructural proteins and, in RHDV, into the capsid protein VP60. The nonstructural  
96 proteins, helicase and RdRp, then form a replication complex (RC), synthesizing  
97 complementary negative-sense RNA from the gRNA, which is used as a template for the  
98 synthesis of gRNA and sgRNA.

99 The positive-strand RNA viruses share a conserved replication mechanism in which viral  
100 proteins induce host cell membrane modification to assemble membrane-associated viral RC  
101 [12]. Viruses hijack host factors to facilitate this energy-consuming process [13]. However,  
102 understanding the detailed molecular mechanism of how viral proteins hijack host factors for  
103 RC assembly has been hampered by the lack of a suitable *in vitro* culture system for RHDV.  
104 Identification of replicase-associated host factors and dissection of their roles in RC assembly  
105 will shed light on the molecular mechanism of RHDV replication. In 2013, we developed an  
106 RHDV replicon system, which has the ability to automatically replicate in RK-13 cells [14].  
107 Construction of this RHDV replicon system has provided a platform for exploring RHDV  
108 replication in host cells. In 2017, we successfully constructed mutant RHDV (mRHDV) in  
109 RK-13 cells *in vitro*, which has a specific receptor-recognition motif (Arg-Gly-Asp) on the  
110 surface of the capsid protein that is characterized by two aa substitutions. mRHDV is  
111 recognized by the intrinsic membrane receptor (integrin  $\alpha 3\beta 1$ ) of RK-13 cells, by which  
112 mRHDV gains entry, replicates, and imparts apparent cytopathic effects [15].

113 In this study, an RHDV RC was isolated for the first time and its main components were  
114 identified. We found that nucleolin (NCL) plays a key role in the formation of viral RCs. Our  
115 data showed that NCL is a link between viral replicase and host proteins. In addition, we  
116 demonstrated that NCL is necessary for RHDV replication because the replication level of  
117 RHDV is significantly affected by knocking down the *NCL* gene in cells.

118

119

## 120 **Results**

### 121 **Tagging of RHDV replicase (RdRp) in the context of a viral replicon**

122 To discover the host factors that are involved in RHDV replication, we attempted to  
123 purify the viral RCs formed during viral replication and identify the associated host factors.  
124 Previously, the researchers successfully identified hepatitis C virus (HCV) replicase-  
125 associated RC components by inserting His and HA tags into the HCV replicon replicase  
126 NS5A and NS5B (RdRp) for affinity purification [16]. Here, we aimed to affinity tag RdRp  
127 with two different tags to facilitate tandem affinity purification. We generated a recombinant  
128 replicon by introducing a His or HA tag into RdRp (aa sites: 25, 82, 442, or 483, respectively)  
129 of the RHDV replicon (Fig. 1A). Moreover, as predicated using the SWISS-MODEL online  
130 tool (<https://swissmodel.expasy.org/>), we found that insertion of the His and/or HA tag into  
131 these sites would have no effect on the structure of RdRp (Fig. S1). Fluc activity analysis  
132 showed that RHDV-luc-His<sub>25</sub>, RHDV-luc-HA<sub>442</sub>, and RHDV-luc-HA<sub>483</sub> replicated similarly  
133 to the untagged RHDV replicon, whereas the replication ability of RHDV-luc-His<sub>82</sub> was  
134 significantly inhibited in RK-13 cells (Fig. 1B). The same results were obtained in  
135 immunoblotting (IB) detection (Fig. 1C). The luciferase activity from the replicon lacking the  
136 RdRp gene has previously been shown to be approximately 4-logs lower than that of the wild  
137 type replicon [14]. In RHDV replicon, the viral sequence was generated as a consequence of  
138 polymerase II transcription from the cytomegalovirus (CMV) promoter, and the authentic 3'  
139 end of the viral genome was under controlled by a hepatitis delta virus ribozyme [17,18].  
140 Subsequently, RdRp, VPg, and other non-structural proteins were translated in a cap-  
141 dependent manner by the host cell. The luciferase is expressed from the subgenomic RNA  
142 which generated by the RHDV RdRp. Thus, we could confirm insertion of His or HA tag at  
143 aa sites 25, 442 or 483 of RdRp.

144 Subsequently, we introduced HA and His peptides into RdRp simultaneously to obtain a  
145 double-affinity-tagged replicon (Fig. 1A). Fluc activity and IB analyses showed that RHDV-  
146 luc-His<sub>25</sub>/HA<sub>442</sub> and RHDV-luc-His<sub>25</sub>/HA<sub>483</sub> replicated similarly to the untagged RHDV  
147 replicon in RK-13 cells (Fig. 1D and 1E). Therefore, we used RHDV-luc-His<sub>25</sub>/HA<sub>442</sub> in  
148 affinity purification assays.

### 149 **Identification of host factors associated with RHDV replicase**

150 After transfection of RK-13 cells with the RHDV-luc-His<sub>25</sub>/HA<sub>442</sub> replicon for 48 h,  
151 solubilized cell lysates were sequentially purified using the HA and His tags. The untagged  
152 RHDV replicon acted as a negative control. After two-step affinity purification, the eluted  
153 protein complexes were resolved by sodium dodecyl sulfate polyacrylamide gel  
154 electrophoresis (SDS-PAGE) and the protein bands were visualized with silver staining (Fig.  
155 2A). In total, 11 specific or enriched bands were sliced from the RHDV-luc-His<sub>25</sub>/HA<sub>442</sub> lane  
156 and the proteins they contained were identified using mass spectrometry (MS) (Table 1). The  
157 identified host proteins were associated with cytoskeleton components, intracellular transport,  
158 chaperone, RNP components, and translation machine-related proteins. Among these proteins,  
159 numerous proteins have been shown to interact with some single-stranded positive-strand  
160 RNA viral proteins to regulate viral replication, such as HnRNPK, HSPA8, DDX5, ANXA2,  
161 and PI4KA [19-23] (Fig. 2B and Table 1). In addition, the protein interaction network of the  
162 identified components of the RC was mapped using STRING online software ([https://string-](https://string-db.org/)  
163 [db.org/](https://string-db.org/)). As showed in Fig. 2C, there are intricate interaction networks for the components of  
164 the RHDV RC. We found that NCL not only binds to the RHDV replicase RdRp but it also  
165 interacts with many host proteins, such as casein kinase II subunit alpha (CSNK2A1),  
166 heterogeneous nuclear ribonucleoprotein K (HnRNPK), 40S ribosomal protein S5 (RPS5),  
167 60S ribosomal protein L11 (RPL11), and so on.

168 **Table 1. Categories of host factors found to be associated with RHDV replicase<sup>a</sup>**

| Category and band no. | Protein score | Mass (kDa) | Gene name      | Protein description                                         | No. of unique peptides | No. of peptides | SC (%) |
|-----------------------|---------------|------------|----------------|-------------------------------------------------------------|------------------------|-----------------|--------|
| <b>RHDV protein</b>   |               |            |                |                                                             |                        |                 |        |
| 6                     | 273.3         | 57.8       | <i>RdRp</i>    | RHDV RdRp                                                   | 3                      | 4               | 21.1   |
| 10                    | 186.4         | 25.1       | <i>p23</i>     | RHDV p23                                                    | 2                      | 3               | 15.5   |
| 11                    | 165.8         | 16.2       | <i>p16</i>     | RHDV p16                                                    | 2                      | 4               | 10.4   |
| <b>Transport</b>      |               |            |                |                                                             |                        |                 |        |
| 8                     | 57.1          | 39.2       | <i>ANXA2</i>   | Annexin A2                                                  | 4                      | 7               | 10.4   |
| 1                     | 201.3         | 233.6      | <i>PI4KA</i>   | Phosphatidylinositol 4-kinase alpha                         | 6                      | 6               | 30.5   |
| 5                     | 303.5         | 68.9       | <i>ALB</i>     | Serum albumin                                               | 8                      | 10              | 15.2   |
| 11                    | 287.6         | 15.6       | <i>HBA</i>     | hemoglobin subunit alpha                                    | 5                      | 5               | 40.4   |
| 6                     | 173.2         | 59.7       | <i>ATP5A1</i>  | F-type H <sup>+</sup> -transporting ATPase subunit beta     | 3                      | 3               | 7.8    |
| 11                    | 365.6         | 16.1       | <i>HBB</i>     | hemoglobin subunit beta                                     | 7                      | 9               | 58.7   |
| 9                     | 98.3          | 32.9       | <i>SLC25A5</i> | solute carrier family 25                                    | 3                      | 3               | 11.2   |
| 11                    | 99.8          | 12.6       | <i>FABP5</i>   | fatty acid-binding protein 5                                | 3                      | 4               | 13.5   |
| <b>Cytoskeleton</b>   |               |            |                |                                                             |                        |                 |        |
| 11                    | 105.5         | 14.3       | <i>CFL1</i>    | Cofilin 1                                                   | 2                      | 6               | 16.8   |
| 3                     | 316.5         | 102.9      | <i>ACTN1</i>   | Actinin alpha 1                                             | 2                      | 7               | 32.4   |
| 4                     | 286.3         | 87.4       | <i>ACTN4</i>   | Actinin alpha 4                                             | 2                      | 6               | 28.5   |
| 8                     | 357.8         | 41.7       | <i>ACTB</i>    | Actin, cytoplasmic 1                                        | 2                      | 5               | 19.0   |
| 7                     | 419.4         | 53.6       | <i>VIM</i>     | Vimentin                                                    | 13                     | 13              | 25.3   |
| <b>RNP complex</b>    |               |            |                |                                                             |                        |                 |        |
| 10                    | 78.5          | 25.7       | <i>HNRNPA1</i> | Heterogeneous nuclear ribonucleoprotein A1                  | 3                      | 7               | 13.6   |
| 10                    | 67.9          | 30.3       | <i>HNRNPAB</i> | Heterogeneous nuclear ribonucleoprotein A/B                 | 2                      | 6               | 8.9    |
| 7                     | 127.2         | 50.9       | <i>HNRNPK</i>  | Heterogeneous nuclear ribonucleoprotein K                   | 4                      | 9               | 11.6   |
| 5                     | 87.0          | 67.5       | <i>DDX5</i>    | DEAD-box helicase 5                                         | 2                      | 4               | 8.3    |
| 5                     | 90.6          | 69.4       | <i>NCL</i>     | Nucleolin                                                   | 8                      | 10              | 28.8   |
| 2                     | 117.8         | 130.7      | <i>SORBS2</i>  | Sorbin and SH3 domain containing 2                          | 5                      | 5               | 14.7   |
| 10                    | 135.6         | 26.2       | <i>NUDT21</i>  | cleavage and polyadenylation specificity factor subunit 5   | 3                      | 3               | 10.4   |
| 5                     | 99.1          | 70.9       | <i>PABPC1</i>  | Polyadenylate-binding protein 1                             | 4                      | 4               | 16.3   |
| 9                     | 128.4         | 36.0       | <i>YBX1</i>    | Nuclease sensitive element-binding protein 1                | 5                      | 6               | 22.1   |
| 6                     | 112.1         | 57.4       | <i>PTBP1</i>   | Polypyrimidine tract-binding protein 1                      | 4                      | 7               | 6.7    |
| 6                     | 65.2          | 52.1       | <i>SRSF1</i>   | splicing factor, arginine/serine-rich 1                     | 6                      | 7               | 8.8    |
| 5                     | 75.9          | 63.5       | <i>CPSF6</i>   | cleavage and polyadenylation specificity factor subunit 6/7 | 3                      | 10              | 10.9   |
| 6                     | 75.2          | 62.5       | <i>DDX41</i>   | Probable ATP-dependent RNA helicase                         | 3                      | 12              | 14.5   |
| <b>Chaperon</b>       |               |            |                |                                                             |                        |                 |        |
| 7                     | 65.2          | 45.1       | <i>CSNK2A1</i> | Casein kinase II subunit alpha                              | 5                      | 5               | 7.5    |
| 4                     | 236.2         | 71.0       | <i>HSPA8</i>   | Heat shock cognate 71 kDa protein                           | 7                      | 7               | 14.2   |
| 9                     | 153.9         | 30.7       | <i>PYCR2</i>   | Pyrrroline-5-carboxylate reductase                          | 4                      | 5               | 16.8   |
| 3                     | 70.1          | 116.8      | <i>DSG1</i>    | Desmoglein 1                                                | 2                      | 5               | 9.0    |
| 11                    | 50.3          | 14.7       | <i>LYZ</i>     | Lysozyme C                                                  | 2                      | 3               | 11.5   |
| 4                     | 53.5          | 73.5       | <i>HSPA9</i>   | eat shock protein family A (Hsp70) member 9                 | 2                      | 2               | 13.8   |
| 10                    | 152.2         | 26.2       | <i>NUDT21</i>  | Nudix hydrolase 21                                          | 3                      | 3               | 24.5   |
| 8                     | 142.8         | 40.3       | <i>PDCD2L</i>  | Programmed cell death protein 2-like                        | 4                      | 4               | 28.7   |
| 11                    | 108.3         | 16.0       | <i>FAM207A</i> | family with sequence similarity 207 member A                | 5                      | 8               | 19.6   |



## NCL is essential for RHDV replication

169 **Table1** (Continued)

| Category and band no. | Protein score | Mass (kDa) | Gene name     | Protein description               | No. of unique peptides | No. of peptides | SC (%) |
|-----------------------|---------------|------------|---------------|-----------------------------------|------------------------|-----------------|--------|
| Translation machines  |               |            |               |                                   |                        |                 |        |
| 7                     | 94.2          | 50.0       | <i>EEF1A</i>  | Elongation factor 1-alpha         | 7                      | 7               | 9.3    |
| 11                    | 135.4         | 17.7       | <i>RPS18</i>  | Ribosomal protein S18             | 4                      | 4               | 18.7   |
| 11                    | 113.3         | 16.3       | <i>AAES</i>   | 40S ribosomal protein S14         | 3                      | 3               | 28.3   |
| 10                    | 174.3         | 20.2       | <i>RPL11</i>  | Ribosomal protein L11             | 4                      | 4               | 20.1   |
| 10                    | 283.1         | 21.2       | <i>RPL12</i>  | Ribosomal protein L12             | 5                      | 5               | 33.5   |
| 11                    | 164.9         | 12.8       | <i>RPL30</i>  | 60S ribosomal protein L30         | 4                      | 4               | 50.5   |
| 11                    | 68.3          | 15.5       | <i>RPS17</i>  | 40S ribosomal protein S17         | 3                      | 3               | 29.6   |
| 10                    | 323.2         | 22.9       | <i>RPS5</i>   | Ribosomal protein S5              | 7                      | 7               | 18.5   |
| 9                     | 258.2         | 31.1       | <i>RPS3</i>   | 40S ribosomal protein S3          | 9                      | 9               | 25.8   |
| 7                     | 74.4          | 45.3       | <i>EIF4A1</i> | Eukaryotic initiation factor 4A-I | 4                      | 6               | 9.7    |
| 11                    | 122.6         | 13.7       | <i>RPS25</i>  | Ribosomal protein S25             | 5                      | 5               | 21.3   |
| 11                    | 75.3          | 14.0       | <i>RPS15A</i> | Ribosomal protein S15a            | 2                      | 5               | 18.3   |

170 <sup>a</sup> Protein lists the gene name for each of the proteins identified in Fig.2B. SC refers to the percent sequence coverage for the  
171 protein.

172

### 173 NCL is involved in RHDV replication

174 NCL is a phosphoprotein that is ubiquitously and abundantly expressed in many  
175 eukaryotic cells and highly conserved during evolution, as it is involved in a remarkably large  
176 number of cellular activities [24]. In general, NCL is mainly distributed in the nucleolus, but  
177 it also exists in the nucleoplasm, cytoplasm, and cell surface, where its specific functions  
178 vary, such as ribosome biogenesis, proliferation, and cell cycle regulation. NCL also plays  
179 important roles in the replication and intracellular trafficking of multiple viruses [25-31].

180 To determine if NCL is required for RHDV replication, RK-13 cells were co-transfected  
181 with an RHDV replicon, NCL siRNA or Flag-tagged NCL plasmids and internal control  
182 plasmid encoding an *Rluc* gene. First, the effect of NCL siRNA on the viability of RK-13  
183 cells was detected using a CCK-8 kit, according to the manufacturer's instruction. We found  
184 that NCL knockdown would have some effect on cell viability and proliferation (Fig. S2A),  
185 meanwhile, resulting the expression level of Rluc was affected (Fig. S2B). Since the toxicity,  
186 cell number, and transfection efficiency of each treatment group have the same effect on the  
187 RHDV replicon and Rluc plasmid, we used Rluc plasmids to eliminate the non-specific

188 effects of siRNA and other treatments on cells, and to correct the experimental data. The  
189 reporter luciferase activity was evaluated using a dual-luciferase reporter assay system with  
190 cell lysates that were harvested at 24 h and 48 h post-transfection (hpt). Fluc activity was  
191 normalized with respect to a co-transfected plasmid encoding an Rluc. Similar results were  
192 obtained in three independent experiments. The results showed that there is a positive  
193 correlation between the expression level of Fluc and NCL. This decreased with increasing  
194 NCL siRNA transfection dose and increased with increased dose of Flag-NCL transfection  
195 (Fig. 3A and 3B).

196 Subsequently, we examined the effect of NCL on mRHDV, which could proliferate in  
197 RK-13 cells [15]. We also used NCL siRNA or Flag-tagged NCL to change the expression  
198 level of NCL, and then infected with mRHDV (MOI = 1). At 48 hpi, the replication level of  
199 mRHDV were detected by WB and qPCR. The results were similar to RHDV replicons. As  
200 shown in Fig. 3C and 3D, the replication level of mRHDV increased with increased dose of  
201 Flag-NCL and decreased with increasing NCL siRNA.

202 In addition, we successfully constructed an RK-NCL cell line, which overexpressed the  
203 *NCL* gene, using a lentiviral packaging system (Fig. 3E). To evaluate the replication  
204 dynamics of mRHDV in RK-NCL cells, the cells were infected with mRHDV (MOI=1), and  
205 subsequently the expression level of VP60 was evaluated with qRT-PCR and WB at 48 hpi.  
206 The results showed that the expression level of VP60 in RK-NCL cells was significantly  
207 higher than that in control cells (RK-GFP cells and RK-13 cells) (Fig. 3E and 3F).  
208 Collectively, these data suggest that NCL is involved in RHDV replication.

### 209 **NCL interaction with RHDV RdRp**

210 NCL is a phosphoprotein with protein-binding activity, and it has been previously  
211 reported that NCL regulates viral replication by binding to viral proteins [32-40]. To

212 determine if NCL regulates RHDV replication through interaction with viral nonstructural  
213 proteins, we used mammalian two-hybrid (M2H) assays to screen the interaction between  
214 NCL and viral nonstructural proteins. As shown in Fig. 4A, NCL interacted with RdRp, p16,  
215 and p23. To determine whether endogenous NCL binds to these viral nonstructural proteins,  
216 during RHDV genome replication, we assessed the interaction between NCL and these viral  
217 proteins in RK-13 cells, in the presence and absence of mRHDV infection for 24 h at 37 °C.  
218 The results of an immunoprecipitation (IP) assay performed with cell lysates using NCL mAb  
219 showed that regardless of whether the cell lysates were treated with RNase, NCL interacted  
220 with RdRp, p16, and p23 in infected cells, but did not in uninfected cells (Fig. 4B).

221 RdRp is a replicase of RHDV that plays a key role in viral replication [41]. To prove  
222 NCL interacts with RdRp, co-immunoprecipitation (Co-IP) assays were used with a myc  
223 mAb in RK-13 cells, which were co-transfected with pRdRp-myc and pNCL-Flag eukaryotic  
224 expression plasmids. We showed that overexpressed NCL-Flag was present in the anti-myc  
225 (RdRp-myc) immunocomplex (Fig. 4C). Furthermore, NCL interacted with RdRp in RHDV-  
226 infected cells (Fig. 4B). These results showed that NCL can interact with RHDV RdRp.  
227 Moreover, an immunofluorescence assay (IFA) was performed using mAbs against NCL and  
228 RdRp in RK-13 cells infected with mRHDV at 24 hours post infection (hpi). As shown in Fig.  
229 4D, NCL was co-localized with RHDV RdRp in the RK-13 cell cytoplasm. In addition, the  
230 distribution of NCL in the cytoplasm increased after RHDV infection.

231 The multifunctionality of NCL mainly results from its multidomain structure, which is  
232 composed of three main structural domains: the N-terminal domain (NTD), the central  
233 domain, and the C-terminal domain (CTD). The central domain contains four RRM, which  
234 are also called RNA-binding domains (RBDs). To identify the functional domain of NCL for  
235 NCL-RHDV RdRp interactions, GST fusion proteins corresponding to NCL and  
236 subfragments (GST-NCL-NTD, GST-NCL-RBD, and GST-NCL-CTD, respectively) were

## NCL is essential for RHDV replication

237 prepared for use as bait proteins in GST pull-down assays, to determine their abilities to  
238 interact with the RdRp protein expressed in RK-13 cells. As shown in Fig. 4E, GST-NCL and  
239 GST-NCL-RBD bound to RdRp whereas the other proteins were undetectable. This result  
240 confirmed that binding to RdRp requires the RBD domain of NCL. To further map the NCL  
241 RBD motif responsible for NCL-RdRp interactions, we prepared GST fusion proteins  
242 corresponding to subfragments of the NCL-RBD domain, including NCL-RRM1, NCL-  
243 RRM2, NCL-RRM3, and NCL-RRM4. A set of pull-down assays showed that GST-NCL-  
244 RBD and GST-NCL-RRM2 interact with RdRp whereas the other proteins did not (Fig. 4F).  
245 These findings indicate that NCL interacts with RHDV RdRp via the RRM2 motif.

246 To characterize the critical domain of RdRp for NCL-RdRp interactions, the GST fusion  
247 proteins corresponding to RdRp and subfragments of RdRp (GST-RdRp, GST-RdRp-N,  
248 GST-RdRp-M1, GST-RdRp-M2, GST-RdRp-M3, and GST-RdRp-C) were prepared for use  
249 as bait proteins in GST pull-down assays, to determine their ability to interact with the NCL  
250 protein expressed in RK-13 cells. The results of these assays showed that GST-RdRp, GST-  
251 RdRp-C and GST-RdRp-M2 bound to NCL, but the other proteins did not, and the binding  
252 ability of GST-RdRp-M2 to NCL is very weak (Fig. 4G). Subsequently, we prepared  
253 subfragments of RdRp<sub>(341-516)</sub> GST fusion proteins, including GST-RdRp<sub>(341-493)</sub>, and GST-  
254 RdRp<sub>(341-470)</sub> for use as bait proteins in GST pull-down assays. As shown in Fig. 4H, GST-  
255 RdRp<sub>(341-516)</sub> and GST-RdRp<sub>(341-493)</sub> bound to NCL whereas GST-RdRp<sub>(341-470)</sub> did not. In  
256 addition, RdRp<sub>(443-516)</sub> was split into the fragments RdRp<sub>(448-516)</sub>, RdRp<sub>(453-516)</sub>, and RdRp<sub>(458-  
257 516)</sub>; and RdRp<sub>(341-493)</sub> was split into the fragments RdRp<sub>(341-485)</sub>, RdRp<sub>(341-478)</sub>, and RdRp<sub>(341-  
258 470)</sub>, which were fused with GST and expressed. The results of further pull-down assays  
259 showed that GST-RdRp<sub>(443-516)</sub>, GST-RdRp<sub>(448-516)</sub>, GST-RdRp<sub>(341-493)</sub>, GST-RdRp<sub>(341-485)</sub>, and  
260 GST-RdRp<sub>(341-478)</sub> bound to NCL whereas the other proteins did not (Fig. 4I). These results

261 suggest that NCL directly and specifically interacts with the C-terminal aa residues 448–478  
262 of RHDV RdRp.

263 In addition, as predicated using the SWISS-MODEL online tool, we found that there is a  
264 "key" and "lock" structure formed by the amino acid sequence 448-478 of RdRp and RRM2  
265 of NCL, providing space for the interaction between NCL and RdRp (Fig. 4J). Moreover,  
266 analysis of the RdRp sequence of GI.1a–GI.1d genotypes of RHDV showed that the C-  
267 terminal aa residues 448–478 were highly conserved (Fig. S3A). Together, these observations  
268 confirm that RHDV RdRp interacts with the RRM2 motif of NCL via the C-terminal aa  
269 residues 448–478, which is a conserved sequence in RHDV.

270

#### 271 **NCL interaction with RHDV p16**

272 The function of p16 in RHDV remains unclear. Previous studies have reported that p16  
273 can accumulate in subnuclear compartments, which may point to a specific interaction with  
274 nucleic acids and/or cellular proteins [42].

275 NCL is one of the most abundant proteins in the nucleolus. To investigate whether NCL  
276 directly interacts with p16, a Co-IP assay was performed with a myc mAb in RK-13 cells,  
277 which were co-transfected with p16-myc and NCL-Flag eukaryotic expression plasmids. IB  
278 analysis using a mAb against the Flag tag showed a band corresponding to NCL in the myc  
279 Co-IP assay, indicating a direct interaction between RHDV p16 and NCL (Fig. 5A).  
280 Moreover, we conducted an IFA using NCL mAbs and p16 polyclonal antibody in RK-13  
281 cells infected with mRHDV at 24 hpi. As shown in Fig. 5B, NCL was co-localized with  
282 RHDV p16 in the RK-13 cell nucleolus and cytoplasm.

283 To investigate the functional areas of NCL in NCL-RHDV p16 interaction, the GST-NCL  
284 fusion protein and its subfragments were used as bait proteins in GST pull-down assays to

## NCL is essential for RHDV replication

285 determine their ability to interact with the p16 protein. As shown in Fig. 5C, only GST-NCL  
286 and GST-NCL-NTD bound p16. This result confirms that binding to p16 requires the NTD  
287 domain of NCL. Subsequently, we prepared subfragments of NCL-NTD GST fusion proteins,  
288 including NCL-NTD<sub>(1-110)</sub>, NCL-NTD<sub>(111-214)</sub>, and NCL-NTD<sub>(215-318)</sub> for use as bait proteins in  
289 a set of GST pull-down assays. As shown in Fig. 5D, GST-NCL-NTD and GST-NCL-NTD<sub>(1-</sub>  
290 <sub>110)</sub> interact with p16 whereas the other proteins did not. Our data indicate that NCL interacts  
291 with RHDV p16 via N-terminal residues 1–110.

292 Next, we identified the critical domain of p16 for NCL-p16 interactions using a series of  
293 glutathione pull-down assays. First, the GST fusion proteins corresponding to p16 and  
294 subfragments of p16 (GST-p16, GST-p16<sub>(1-70)</sub>, GST-p16<sub>(20-143)</sub>, GST-p16<sub>(40-143)</sub>, GST-p16<sub>(60-</sub>  
295 <sub>143)</sub>, and GST-p16<sub>(70-143)</sub>) were prepared for use as bait proteins in GST pull-down assays, to  
296 determine their ability to interact with NCL protein expressed in RK-13 cells. The results of  
297 these assays showed that GST-p16, GST-p16<sub>(1-70)</sub> and GST-p16<sub>(20-143)</sub> bound to NCL, but the  
298 other proteins did not (Fig. 5E-F). Subsequently, to pinpoint the key aa responsible for  
299 binding of RHDV p16 with NCL, blocks of five aa substitutions were introduced within and  
300 beyond the conserved sequence motif. The following non-conservative substitutions to the  
301 GST-tagged RHDV p16 protein were made: <sup>20</sup>PLSFF<sup>24</sup>TKVQQ, <sup>25</sup>LDLRD<sup>29</sup>KRKHR,  
302 <sup>30</sup>KTPPC<sup>34</sup>LFATR, and <sup>35</sup>CIRAT<sup>39</sup>RHDFP. Furthermore, GSGSGS was inserted after aa  
303 residue 38. It has been reported that GSGSGS is a flexible peptide used in different  
304 expression systems to separate functional proteins [43]. Wild-type and mutant RHDV p16  
305 proteins were used as bait proteins in the GST pull-down assays to determine their ability to  
306 bind NCL. As shown in Fig. 5G, the <sup>35</sup>CIRAT<sup>39</sup>RHDFP mutation was not able to bind NCL;  
307 the binding capacities of the other mutations to the residues at positions 20–40 were partially  
308 reduced. In addition, analysis of the p16 sequence of the GI.1a–GI.1d genotypes of RHDV  
309 showed that the <sup>35</sup>CIRAT<sup>39</sup> motif was highly conserved (Fig. S3B). These observations

310 confirm that NCL interacts with RHDV p16 via aa residues 1–110 of the NTD domain of  
311 NCL bound to the <sup>35</sup>CIRAT<sup>39</sup> motif of p16.

### 312 **NCL interaction with RHDV p23**

313 The function of p23 of RHDV is also unclear. Previous studies have reported that RHDV  
314 p23 is similar to other caliciviruses, which show an endoplasmic reticulum-like localization  
315 pattern [42]. It is well known that the murine norovirus (MNV), human norovirus (NV), and  
316 feline calicivirus (FCV) homologues of p23 play a role in the induction of intracellular  
317 membrane rearrangements associated with viral replication [44-46]. As previously described,  
318 NCL may have a direct role in the assembly of the ribosomal subunits by bringing together  
319 ribosomal proteins and RNA [47].

320 To identify whether p23 directly interacts with NCL, a Co-IP assay was used with a myc  
321 mAb in RK-13 cells, which were co-transfected with p23-myc and NCL-Flag eukaryotic  
322 expression plasmids. IB analysis using a mAb against the Flag tag showed a band  
323 corresponding to NCL in the myc Co-IP assay, indicating a direct interaction between RHDV  
324 p23 and NCL (Fig. 6A). In addition, we performed an IFA using mAbs against NCL and  
325 polyclonal antibody against p23 in RK-13 cells infected with mRHDV at 24 hpi. The result  
326 showed that NCL was co-localized with p23 in the RK-13 cell cytoplasm (Fig. 6B).

327 To characterize the critical domain of NCL for NCL-RHDV p23 interactions, the GST  
328 fusion proteins corresponding to NCL and subfragments were used as bait proteins in GST  
329 pull-down assays to determine their ability to interact with p23 protein expressed in RK-13  
330 cells. As shown in Fig. 6C, both GST-NCL and GST-NCL-RBD bound to RHDV p23, but  
331 the other proteins did not. Subsequently, the subfragments of NCL-RBD GST fusion proteins  
332 were used as bait proteins in a GST pull-down assay. As shown in Fig. 6D, GST-NCL-RRM1  
333 and GST-NCL-RBD bound to RHDV p23 whereas the other proteins did not. Together, these

334 results suggested that RHDV p23 directly and specifically interacts with RRM1 motif of  
335 NCL.

336 To map the RHDV p23 segments responsible for p23-NCL interactions, GST fusion  
337 proteins corresponding to subfragments of p23 (p23<sub>(1-70)</sub>, p23<sub>(70-145)</sub>, and p23<sub>(145-224)</sub>) were  
338 prepared for use as bait proteins in GST pull-down assays to determine their ability to interact  
339 with NCL protein expressed in RK-13 cells. Results of a set of pull-down assays showed that  
340 GST-p23<sub>(70-145)</sub> and GST-p23 interact with NCL (Fig. 6E). Subsequently, subfragments of  
341 p23<sub>(70-145)</sub> GST fusion proteins including GST-p23<sub>(90-145)</sub>, GST-p23<sub>(110-145)</sub>, and GST-p23<sub>(70-125)</sub>  
342 were prepared for use as bait proteins in a GST pull-down assay. As shown in Fig. 6F, GST-  
343 p23<sub>(90-145)</sub> and p23<sub>(70-145)</sub> bound to NCL whereas the other proteins did not. Our data indicate  
344 that RHDV p23 interacts with NCL via aa residues 90–145. Moreover, as predicated using  
345 the SWISS-MODEL online tool, we found that there is a " mortise " and " tenon " structure  
346 formed by the amino acid sequence 90-145 of p23 and RRM1 of NCL, which providing a  
347 structural basis for the interaction between NCL and p23 (Fig. 6G). In addition, analysis of  
348 the p23 sequence of GI.1a–GI.1d genotypes of RHDV showed that the aa sequence 90–145  
349 of RHDV p23 is conserved (Fig. S3C). These results suggest that NCL interacts with RHDV  
350 p23 via the RRM1 motif of NCL bound to the aa sequence 90–145 of p23.

### 351 **NCL is required for RHDV replication**

352 The above results fully demonstrated that NCL binds to the RdRp, p16, and p23 proteins  
353 of RHDV. To explore the role of these interactions in RHDV replication, a series of  
354 recombinant RHDV replicons were obtained by mutating or replacing the region that  
355 interacts with NCL in the wild-type RHDV replicon. The luciferase activity of RK-13 cells  
356 transfected with these recombinant RHDV replicons were analyzed and compared. The  
357 abundance of Fluc mRNA in the absence or presence of these binding sites, interacting with



## NCL is essential for RHDV replication

358 NCL, was evaluated by qRT-PCR. Our results showed that the expression levels of Fluc  
359 derived from RHDV-luc/ $\Delta$ RdRp, RHDV-luc/ $\Delta$ RdRp<sub>(448-478)</sub>, RHDV-luc/ $\Delta$ p16, RHDV-  
360 luc/ $\Delta$ p16<sub>(35-38)</sub>, RHDV-luc/ $\Delta$ p23, and RHDV-luc/ $\Delta$ p23<sub>(90-145)</sub> were approximately 7%, 9%,  
361 51%, 52%, 46%, and 44% respectively, compared with RHDV-luc (Fig. 7A). Subsequently,  
362 using the lentiviral packaging system, we successfully obtained RK-NCL-NTD, RK-NCL-  
363 RBD, and RK-NCL-CTD cell lines stably expressing the NCL NTD, RBD, and CTD  
364 domains, respectively (Fig. S4). We found that the replication levels of the RHDV replicon  
365 and mRHDV were significantly increased in RK-NCL and RK-NCL-RBD cells and  
366 significantly decreased in RK-NCL-NTD cells, but not in RK-NCL-CTD or RK-GFP cells  
367 (Fig. 7B and 7C). In addition, to better reflect the effects of NCL domains on RHDV  
368 replication, we inoculated mRHDV (MOI = 0.1) at low doses in each cell line. The mRHDV  
369 was constructed in our previous study and it has been determined that the virus can efficiently  
370 replicate in RK-13 cells [15]. The results showed that the level of replication of mRHDV in  
371 each cell line was similar to that of the RHDV replicon. From the above results, we revealed  
372 that the RBD domain is a functional domain that binds NCL to RdRp and p23, and the NTD  
373 domain is an active region that binds NCL to p16. Therefore, NCL segments that bind to the  
374 nonstructural proteins of RHDV play an important role in RHDV replication.

375 Moreover, we blocked the binding site of NCL-RdRp or NCL-p16 with a synthesized  
376 peptide (RdRp peptide: ERGVQLEELQVAAA AHGQEFFNFVRKELER; p16 peptide:  
377 PLSFFLDLRDKTPPCIRAT, respectively) and examined the effect on the RHDV replicon  
378 and mRHDV replication. As shown in Fig. 7D and 7E, the replication level of the RHDV  
379 replicon and mRHDV were all drastically reduced in RK-13 cells treated with the RdRp  
380 peptides or p16 peptides, and there was a negative correlation with the dose of the  
381 synthesized peptide. Of course, the non-specific peptides (HKFGPVCLCNRAYIHDCGRW)  
382 had no effect on the replication of RHDV. We also found that these peptides have a greater

383 effect on the replication of RHDV replicon than mRHDV. Although the RHDV replicon is a  
384 replication model of the virus, it lacks capsid protein and cannot be assembled into viral  
385 particles. Therefore, the RHDV replicon may not fully reflect the replication process of the  
386 virus in the cell. We speculate that there are some other mechanisms that regulate RHDV  
387 replication.

388 In addition, the above experimental results were conducted using RK-13 cells infected  
389 with mRHDV or transfected with the RHDV replicon. To assess the role of NCL-RdRp and  
390 NCL-p16 interactions during infection with wild-type RHDV, rabbits were injected with the  
391 RdRp peptide, p16 peptide, non-specific peptide or PBS, immediately after infection with  
392 wild-type RHDV. Over the next 7 days, we counted deaths among experimental rabbits (Fig.  
393 7F). As shown in Fig. 7G, the survival rates of rabbits against virulent RHDV in the groups  
394 injected with RdRp peptide and p16 peptide was 60% and 40%, respectively. However, all  
395 rabbits injected with in the non-specific peptide group and PBS group (negative controls)  
396 died within 24–48 hpi with virulent RHDV. These negative control animals exhibited clinical  
397 symptoms of RHDV infection.

398 Together, these results suggest that the interactions between NCL and the nonstructural  
399 proteins of RHDV (RdRp, p16, and p23) have important roles in RHDV replication.  
400 Importantly, NCL is required for RHDV replication.

#### 401 **NCL is a link in RHDV replication complex (RC) formation**

402 The positive-strand RNA viruses share a conserved replication mechanism in which viral  
403 proteins induce host membrane modification to assemble membrane-associated viral RCs  
404 [12]. Viruses hijack host factors to facilitate this energy-unfavorable process [13]. Therefore,  
405 the components of the viral RC are numerous and complex. NCL is capable of binding to

406 nonstructural proteins (RdRp, p16, and p23) of RHDV and is involved in the formation of  
407 RHDV RCs.

408 To investigate the specific role of NCL in the formation of RHDV RCs, M2H assays were  
409 used to screen the interactions between viral nonstructural proteins and multiple host factors  
410 in RCs. As shown in Fig. 8A, there are complex interactions between viral nonstructural  
411 proteins and host factors in RCs. For example, p16 interacts with itself, helicase, p29,  
412 protease, and NCL; p23 binds to protease and NCL; p29 binds to helicase and VPg; helicase  
413 interacts with itself; VPg binds to protease; protease interacts with itself and RPS5; RdRp  
414 interacts with RPS5; and NCL binds to HnRNPK, CSNK2A1, RPS5, and RPL11. We  
415 subsequently used a series of Co-IP assays with a myc mAb in RK-13 cells, which were co-  
416 transfected with bait (myc fusion protein) and prey (Flag fusion protein) eukaryotic  
417 expression plasmids. IB analysis using a mAb against Flag showed the specific band  
418 corresponding to prey proteins in the myc Co-IP assay (Fig. 8B). These results reveal that  
419 RHDV replicase RdRp cannot directly bind to other nonstructural proteins of the virus. It is  
420 noteworthy that NCL directly interacts with RHDV RdRp and nonstructural proteins (p16  
421 and p23).

422 To test the hypothesis that nucleolin acts as a platform for the RdRp to be attracted to the  
423 p16 and p23 proteins, a series of HA tag affinity purification analyses were performed by  
424 transfection with the RHDV-luc-His/HA replicon in RK-13 cells that were treated with RdRp  
425 peptide, NCL siRNA, or PBS, and in RK-NCL cells. Using IB to detect the purified RdRp-  
426 associated protein, we found that the content of purified p16 and p23 in the RdRp peptide- or  
427 NCL siRNA-treated cells was significantly reduced or even lost in the RC, and partially  
428 increased in RK-NCL cells (Fig. 8C). In addition, the eluted protein complexes were resolved  
429 by SDS-PAGE and the protein bands were visualized with silver staining. As shown in Fig.  
430 8D, the RdRp-associated protein content was significantly reduced in RdRp peptide- or NCL

431 siRNA-treated cells and significantly increased in RK-NCL cells. Together, these data suggest  
432 that RHDV completes its replication process by hijacking NCL to recruit other viral proteins  
433 and host factors, to thus assemble the RHDV RC.

## 434 **Discussion**

435 Positive-strand RNA viruses encompass more than one-third of known virus genera and  
436 include many medically and practically important human, animal, and plant pathogens [48].  
437 At the outset of infection, positive-strand RNA virus genomes are used as templates for viral  
438 protein synthesis in cytoplasm. Subsequently, viral protein recruits host factors to form an RC  
439 and redirects the viral genome to function as mRNA, serving as a template for synthesizing  
440 new positive-strand gRNA and subgenomic mRNA [48]. Therefore, identification of the  
441 components of the viral RC and the interrelationships among the various components,  
442 particularly those that interact with viral replicase, will help in understanding the molecular  
443 mechanisms of viral replication.

444 As an important member of the positive-strand RNA viruses, the *Caliciviridae* family has  
445 attracted increasing attention because it contains many viruses that infect a wide spectrum of  
446 hosts and are a growing threat to human and animal health. However, most caliciviruses  
447 cannot be cultured *in vitro*, including some important pathogens such as RHDV and NV;  
448 therefore, the replication and pathogenic mechanisms of these viruses remain poorly  
449 understood. The emergence and advancement of reverse genetic manipulation technology has  
450 provided an excellent operating platform for revealing the molecular mechanism of  
451 calicivirus replication. For example, using a NV replicon, a series of works have been carried  
452 out to reveal the mechanism of NV replication [49-53]. Recently, we also successfully  
453 established an RHDV replicon operating platform [14] and have applied it to study the  
454 genomic structure and function of RHDV.

455 In this study, we purified viral replicase and identified the replicase-associated host  
456 factors using an RHDV replicon system in which two different affinity tags were  
457 simultaneously inserted in-frame into RdRp. We determined that NCL plays a key role in the  
458 formation of RHDV RCs. On the one hand, NCL binds to RHDV replicase (RdRp) (Fig. 4).  
459 Similar to other positive-sense RNA viruses, RHDV RdRp has a central role in the viral  
460 replication cycle. RdRp has many enzymatic properties; it binds template RNAs, initiates  
461 replication, catalyzes elongation, and terminates replication [54]. Moreover, RdRp is able to  
462 induce the redistribution of Golgi membranes in kidney and liver cell lines of three different  
463 species [55]. Here, our data suggested that interaction between NCL and RdRp is required for  
464 RHDV replication (Fig. 7). On the other hand, NCL also interacts with some important host  
465 factors, such as HNRNPK, RPL11, CSNK2A1, and RPS5 (Figs. 2, 8, 9). Previous studies  
466 have shown that these proteins are involved in the replication of various viruses. For example,  
467 HNRNPK has been reported to recognize the 5' terminal sequence of HCV RNA [56],  
468 CSNK2A1 interaction with NS1 plays an important part in parvovirus replication [57]; and  
469 RPL11 and RPS5 are components of the ribonucleoprotein complex [58,59]. Therefore, we  
470 hypothesize that these host factors may also be involved in the replication of RHDV.

471 We also identified that NCL interacts with nonstructural proteins (p16 and p23) of RHDV  
472 (Figs. 5, 6). By blocking the interaction of NCL with p16 and p23, we found that these  
473 interactions have important roles in RHDV replication (Fig. 7). Previous studies have  
474 reported that p16 can accumulate in subnuclear compartments, which may point to a specific  
475 interaction with nucleic acids and/or cellular proteins [42]. A similar nuclear/subnuclear  
476 accumulation of nonstructural proteins has been reported in picornavirus, for which nuclear  
477 accumulation of the 2A protein and a close association of this protein with the nucleolar  
478 ribosomal chaperone protein B23 have been reported. It was suggested that 2A upregulates  
479 the formation of modified ribosomes with a preference for viral internal ribosomal entry sites,

480 thereby contributing to the inhibition of cap-dependent cellular mRNA translation [60]. Here,  
481 we revealed that NCL interacts with p16 of RHDV via the NTD domain (Fig. 5) and that this  
482 interaction plays a role in RHDV replication (Fig. 7). The N-terminal domain of NCL  
483 contains acidic regions, rich in glutamic acid and aspartic acid, which are the sites of  
484 phosphorylation and participate in the transcription of rRNA and interact with components of  
485 the pre-rRNA processing complex [24]. Therefore, we speculate that RHDV utilizes the  
486 interaction between p16 and NCL to hijack NCL-associated machinery of rRNA transcription  
487 and pre-rRNA processing to replicate viral gRNA. In addition, the role of p23 in RHDV  
488 replication is still unclear. Previous studies have found that, similar to other caliciviruses,  
489 RHDV p23 is enriched in the endoplasmic reticulum membrane and plays an important part  
490 in inducing intracellular membrane rearrangement [42]. Therefore, we believe that p23  
491 interacts with NCL to recruit replication-associated host proteins to the endoplasmic  
492 reticulum membrane, and assembles these to form membrane-associated RCs.

493 NCL is an abundant and ubiquitously expressed protein in many growing eukaryotic cells  
494 [24]. NCL is mainly localized within the nucleolus, but it also exists in the nucleoplasm,  
495 cytoplasm, and cell surface [25,26]. NCL controls a wide range of fundamental cellular  
496 processes, such as ribosome biogenesis, proliferation, and cell cycle regulation, and it also  
497 has important roles in the infection process of multiple viruses [24]. For example, NCL acts  
498 as a receptor for human respiratory syncytial virus [61]. NCL also mediates cellular  
499 attachment and internalization of enterovirus 71 [62]. A recent study showed that NCL  
500 interacts with the capsid protein of dengue virus, suggesting a role in viral morphogenesis  
501 [63]. In previous studies, we also found that NCL mediates the internalization of RHDV  
502 through interacting with the RHDV capsid protein [64]. Of note, NCL also plays an important  
503 part in replication of several viruses. For example, NCL interacts with the FCV NS6  
504 (protease) and NS7 (polymerase) proteins, and has a role in virus replication [34]. Similarly,

505 the interaction between NCL and the UTRs of FCV [34] and poliovirus [65] stimulates  
506 translation of viral proteins. Moreover, NCL binds to a protein of herpes simplex virus type 1  
507 to facilitate the export of US11 from the cell nucleus to the cytoplasm [66]. However, the  
508 function of NCL in binding to RHDV replicase and recruiting host factors to form RCs had  
509 not been revealed until now. Here, we demonstrate for the first time that NCL can  
510 specifically bind to RHDV replicase (RdRp) and can act as a link, recruiting host factors and  
511 viral proteins, to form RHDV RCs. Our findings enrich the current knowledge about the  
512 mechanism of NCL regulation of viral replication and provides new clues for further  
513 exploration of the interaction between RHDV and host proteins.

514 In conclusion, we identified the components of the RHDV RC, for the first time. We  
515 found that NCL acts as a link to recruit host factors, viral replicase (RdRp), and nonstructural  
516 proteins (p16 and p23), thereby forming a complex and ordered RHDV RC (Fig. 9).  
517 Elucidation of the molecular mechanism by which NCL regulates viral replicase assembly  
518 may lead to new insights into viral RC biogenesis and novel antiviral strategies.

## 519 **Materials and Methods**

### 520 **Ethics Statement**

521 All experiments were performed in a secondary biosecurity laboratory. All experiments  
522 involving rabbits were carried out in strict accordance with the recommendations of the  
523 Guide for the Care and Use of Laboratory Animals of the Ministry of Science and  
524 Technology of the People's Republic of China, and all efforts were made to minimize  
525 suffering. All animal procedures were approved by the Institutional Animal Care and Use  
526 Committee of the Shanghai Veterinary Research Institute, Chinese Academy of Agricultural  
527 Sciences (permit number: SHVRIAU-18-035).

### 528 **Plasmids**

529 The pRHDV-luc plasmid, in which the *VP60* and partial *VP10* genes are replaced with the  
530 *Fluc* gene, was generated in our previous study [14]. To generate pRHDV-luc-HA1,  
531 pRHDV-luc-HA2, pRHDV-luc-His1, and pRHDV-luc-His2, the nucleotide sequence  
532 encoding a hemagglutinin (HA) peptide (TAC CCA TAC GAT GTT CCA GAT TAC GCT)  
533 or a His<sub>6</sub> peptide (CAT CAT CAT CAT CAT CAT) were inserted into the RdRp region using  
534 fusion polymerase chain reaction (PCR). The pRHDV-luc-His1/HA1, pRHDV-luc-His1/HA2,  
535 pRHDV-luc-His2/HA1, and pRHDV-luc-His2/HA2 plasmids, in which HA and His tags  
536 were simultaneously inserted in-frame into RdRp, were generated by fusion PCR (Fig. 1A).  
537 In addition, pRHDVΔp16-luc, pRHDVp16<sup>(35RHDF<sup>38</sup>)</sup>-luc, pRHDVΔp23-luc,  
538 pRHDVΔp23(90-145)-luc, pRHDVΔRdRp-luc, and pRHDVΔRdRp(448-478)-luc were  
539 constructed using fusion PCR.

540 The lentivirus-based expression plasmids were generated with a pLOV-CMV-GFP vector  
541 (Neuron Biotech, China) using In-Fusion HD Cloning kits (Clontech Laboratories, Inc.,  
542 USA), according to the manufacturer's instructions. The pLOV-CMV-GFP vector was  
543 linearized with *Nhe* I and *Not* I. The packaging plasmid psPAX2 containing the specific  
544 lentivirus genes Gag, Pol, and so on, and the pMD2.G plasmid, which expresses the G protein  
545 of the vesicular stomatitis virus (VSV-G), were purchased from Neuron Biotech.

546 The plasmids, used in M2H assays, were generated with the pACT and pBIND vectors  
547 (Promega Corporation, USA) using In-Fusion HD Cloning kits. The pG5luc vector (Promega)  
548 contains five GAL4 binding sites upstream of the TATA box, which controls *Fluc* expression.  
549 The pGL4.75 vector (Promega) encodes the luciferase reporter gene *Renilla reniformis* (*Rluc*)  
550 from a CMV promoter.

551 The p3×FLAG-CMV-14 vector (Sigma-Aldrich Corporation, USA) and pCMV-Myc  
552 (Clontech Laboratories, Inc.) were used to create mammalian expression constructs. The  
553 pGEX-4T-1 vector (GE Healthcare Life Sciences, USA) was expressed in competent *E. coli*



554 BL21-CodonPlus (DE3) cells. *NCL* (GenBank accession number XM\_017343189.1),  
555 *CSNK2A1* (GenBank accession number NM\_001160284.1), *HnRNPK* (GenBank accession  
556 number NM\_001082125.1), *RPL11* (GenBank accession number XM\_008265690.2), and  
557 *RPS5* (GenBank accession number XM\_002721896.3) sequences were amplified by reverse  
558 transcription PCR (RT-PCR) from an RK-13 cell cDNA library. Total RNA was isolated  
559 from RK-13 cells using TRIzol reagent (Invitrogen Corporation, USA), according to the  
560 manufacturer's instructions. DNA was removed from the isolated RNA using DNase I  
561 (Takara Bio, Inc., Japan) and cDNA was produced with Moloney murine leukemia virus  
562 reverse transcriptase (M-MLV RT) (Promega) and random hexamers. RHDV genes (*p16*, *p23*,  
563 *helicase*, *p29*, *VPg*, *protease*, and *RdRp*) were amplified using RT-PCR from RHDV cDNA.  
564 The genomic sequence of RHDV CHA/JX/97 was retrieved from the GenBank database  
565 (accession number DQ205345). Viral cDNA was generated as described in our previous  
566 report. All plasmids were created using In-Fusion HD Cloning kits, according to the  
567 manufacturer's instructions.

568 All RT-PCR and PCR amplifications for cloning were performed with TransStart®  
569 FastPfu Fly DNA Polymerase (TransGen Biotech Co., Ltd., China), according to the  
570 manufacturer's instructions. RT-PCR and PCR products were separated by agarose gel  
571 electrophoresis and purified with a SanPrep Column DNA Gel Extraction Kit (Sangon  
572 Biotech Co., Ltd., China). Restriction digests were performed using commercial kits (New  
573 England Biolabs, USA), according to the manufacturer's instructions. All plasmid sequences  
574 were amplified by PCR and analyzed by Sanger sequencing, to verify the sequence fidelity  
575 and reading frames (Sangon Biotech). The details of all constructs used in the study,  
576 including residue numbers, expression vectors, and tags, are summarized in Table S1. In  
577 addition, the primers used in this research are listed in Table S2.

## 578 Cell lines and viruses

579 Rabbit kidney cells (RK-13, ATCC, CCL37) and 293T cells (ATCC, CRL-3216) were  
580 routinely maintained in minimal essential medium (MEM) (Life Technologies, USA) or  
581 Dulbecco's modified Eagle's medium (DMEM) (Life Technologies), respectively,  
582 supplemented with 10% fetal bovine serum (Biological Industries, Israel). RK-NCL cells,  
583 RK-NCL-NTD cells, RK-NCL-RBD cells, RK-NCL-CTD cells, and RK-GFP cells were  
584 generated by transducing RK-13 cells with VSV-G pseudotyped lentiviral particles, which  
585 contain the *NCL* gene, NCL-NTD domain, NCL-RBD domain, NCL-CTD domain, or *GFP*  
586 gene. To generate those recombinant lentiviral particles, we transfected psPAX2 (10 µg),  
587 pMD2.G (12 µg), and pLOV-NCL-GFP (22 µg), pLOV-NTD-GFP (22 µg), pLOV-RBD-  
588 GFP (22 µg), pLOV-CTD-GFP (22 µg) or pLOV-CMV-GFP (22 µg), respectively, into 293T  
589 cells, which were seeded ( $1 \times 10^6$  cells) onto 100-mm tissue culture dishes, using a calcium  
590 phosphate transfection reagent (Invitrogen). The lentivirus packaging and transduction  
591 procedures are based on our previous studies [4]. For the RHDV replicon replication assay,  
592 these five stable cell lines, with exactly the same number of passages, were used to avoid the  
593 effect of cell passage variation on RHDV replication.

594 RHDV strain JX/CHA/97 was isolated in 1997 during an outbreak of RHDV in China  
595 and stored in our laboratory. The genomic sequence of RHDV CHA/JX/97 is available in the  
596 GenBank database (accession number DQ205345). mRHDV was mutated from RHDV strain  
597 JX/CHA/97 and stored in our laboratory [15].

#### 598 **Antibodies and chemicals**

599 The antibodies used in this study included: mouse anti-His, anti-HA, anti-luc, and anti-myc  
600 antibodies purchased from Abcam; mouse anti-Flag obtained from Sigma-Aldrich; mouse  
601 anti-β-actin and anti-GST antibodies purchased from Kangwei Century Biotechnology;  
602 mouse anti-NCL and rabbit anti-NCL obtained from Thermo Fisher Scientific; mouse anti-

603 RHDV RdRp was prepared by Genscript and stored in our laboratory; polyclonal rabbit anti-  
604 RHDV p16 and anti- RHDV p23 were prepared and stored in our laboratory; goat anti-  
605 mouse IgG conjugated with HRP and goat anti-rabbit IgG conjugated with HRP purchased  
606 from Jackson ImmunoResearch Europe Ltd.; goat anti-mouse IgG conjugated with Alexa  
607 Fluor 488, goat anti-rabbit IgG conjugated with Alexa Fluor 488, goat anti-mouse IgG  
608 conjugated with Alexa Fluor 633, and goat anti-rabbit IgG conjugated with Alexa Fluor 633,  
609 obtained from Thermo Fisher Scientific. DAPI staining solution purchased from Beyotime  
610 Biotechnology. *Nhe* I and *Not* I obtained from New England Biolabs. CCK-8 kit purchased  
611 from Dojindo Laboratories. RdRp peptide  
612 (ERGVQLEELQVAAAAHGQEFFNFVRKELER), p16 peptide  
613 (PLSFFLDLRDKTPPCIRAT) and non-specific peptide (HKFGPVCLCNRAYIHDCGRW)  
614 were synthesized by GL Biochem (Shanghai) Ltd, and the purity was 90%. We dissolved  
615 these peptides in PBS at a concentration of 10 ng/ $\mu$ L. Then, these peptides were directly  
616 added into the cell culture medium at different working concentrations, respectively, and  
617 these peptides entered in the cytoplasm by macropinocytosis.

#### 618 **Affinity purification of protein complex**

619 RK-13 cells were seeded onto ten 100-mm tissue culture dishes at a density of  $1 \times 10^6$   
620 cells/dish. The cells were grown overnight and then transfected with pRHDV-luc-His1/HA1  
621 (12  $\mu$ g /dish) using Lipofectamine 3000 (Invitrogen), according to the manufacturer's  
622 instructions. After 48 hpt, the cells were washed three times with cold Modified Dulbecco's  
623 phosphate-buffered saline (MDPBS; Thermo Scientific™ Pierce™, USA). The cells were  
624 then lysed with 500  $\mu$ L/dish of ice-cold lysis buffer (Tris, 0.15 M NaCl, 0.001 M EDTA, 1%  
625 NP-40, 5% glycerol; pH 7.4, proteinase inhibitor cocktail (Thermo Scientific). After  
626 incubating cells on ice for 5 min with periodic mixing, the lysate was transferred to a

627 microcentrifuge tube and centrifuged at  $\sim 13,000 \times g$  for 10 min to pellet the cell debris. The  
628 soluble fraction was incubated by head-to-tail rotation with 300  $\mu\text{L}$  of anti-HA antibody-  
629 coated beads (Thermo Scientific) for 4 h at  $4^\circ\text{C}$ . The beads were collected by centrifugation  
630 and then washed four times with 10 mL washing buffer (Tris, 0.15 M NaCl, 0.001 M EDTA,  
631 1% NP-40, 5% glycerol; pH 7.4, 20 mM imidazole (Thermo Scientific). After being washed,  
632 the bound proteins were eluted with 400  $\mu\text{L}$  of wash buffer supplemented with 250  $\mu\text{g}/\text{mL}$   
633 HA peptide (Sigma-Aldrich) by incubation at room temperature for 10 min. After  
634 centrifugation at  $3,000 \times g$  for 5 min, followed by a second elution with 200  $\mu\text{L}$  of wash  
635 buffer supplemented with 250  $\mu\text{g}/\text{mL}$  HA peptide. The eluted solutions were combined and  
636 diluted into 1.5 mL of lysis buffer containing 20 mM imidazole, and 60  $\mu\text{L}$  of Ni Sepharose  
637 (Thermo Scientific) was added. After incubation at  $4^\circ\text{C}$  for 1 h and clarification, the beads  
638 were washed four times with 1.5 mL wash buffer. The captured proteins were eluted in 80  $\mu\text{L}$   
639 wash buffer containing 240 mM imidazole and mixed with 20  $\mu\text{L}$  of 5X SDS loading buffer  
640 (250 mM Tris Cl (pH 6.8), 30% glycerol, 10% SDS, 0.02% bromophenol blue, 25% 2-  
641 mercaptoethanol). After being boiled for 10 min, the proteins samples were separated by  
642 SDS-PAGE, and protein bands were visualized with silver staining.

### 643 **Quantitative reverse transcription (qRT)-PCR**

644 Total RNAs were purified using TRIzol reagent (Invitrogen), according to the  
645 manufacturer's instructions. DNA was removed from the isolated RNA using DNase I  
646 (Takara), and then cDNA was produced using M-MLV RT (Promega) and random hexamers.  
647 The cDNA samples were subjected to real-time PCR with SYBR Premix *Ex Taq* Tli RNase H  
648 Plus (Takara) using an ABI 7500 Fast Real-Time PCR system (Applied Biosystems, USA).  
649 The primers are listed in Table S2. The relative RNA levels were determined according to the  
650  $2^{-\Delta\Delta\text{CT}}$  method. The amount of mRNA in each sample was normalized to that of GAPDH.

## 651 **Mammalian two-hybrid (M2H) assays**

652 The interactions between host protein and RHDV nonstructural proteins were evaluated  
653 using a CheckMate Mammalian Two-Hybrid System (Promega). The proteins expressed  
654 from the pACT vector recombinant plasmid acted as prey proteins, and proteins expressed  
655 from the pBIND vector recombinant plasmid acted as bait proteins. Subsequent M2H  
656 analysis was performed, according to the manufacturer's instructions. In brief, bait and prey  
657 plasmids were co-transfected with pG5luc plasmids into subconfluent 293T cells at a molar  
658 ratio of 1:1:1 for pACT: pBIND: pG5luc vector. At 48 h after transfection, the 293T cells  
659 were lysed, and Renilla luciferase (Rluc) and firefly luciferase (Fluc) activities were  
660 evaluated using the Dual-Luciferase Reporter (DLR™) Assay System (Promega).

## 661 **Luciferase activity measurements**

662 Cells were washed with PBS and lysed in 200  $\mu$ L of 1X Passive Lysis Buffer (Promega).  
663 After gentle shaking for 15 min at room temperature, the cell lysate was transferred to a tube  
664 and centrifuged for 2 min at 12,000  $\times$  g at 4°C. The supernatant (20  $\mu$ L) was added to 100  $\mu$ L  
665 of luciferase assay substrate to evaluate the activity of Fluc and Rluc using the Promega  
666 DLR™ assay system, based on relative light units (RLUs). Luciferase activity was analyzed  
667 using a FB12 luminometer (Berthold, Germany). To normalize the luciferase values  
668 determined for cells transfected with the Fluc replicon, Rluc activity was used as an internal  
669 control.

## 670 **Bacterial expression of recombinant proteins and purification**

671 All proteins were expressed in competent *E. coli* BL21-CodonPlus (DE3) cells (TransGen  
672 Biotech Co., Ltd.) that were seeded in 1 mL of an overnight starter culture and then grown in  
673 100 mL of Luria-Bertani (LB) broth with shaking at 220 rpm at 37°C to mid-log phase

674 (~0.6–0.8 OD<sub>600</sub>). Cells were then typically induced with 0.2–0.5 mM isopropyl β-D-1-  
675 thiogalactopyranoside and incubated for approximately 16 h at 16°C with shaking at 220 rpm.  
676 The details of protein expression are available on request. Cells were pelleted by  
677 centrifugation at ~5,000 × g and stored at –80°C. Bacterial pellets were resuspended in lysis  
678 buffer (20 mM Tris/HCl; pH 7.4, 60 mM NaCl, 1 mM ethylenediaminetetraacetic acid  
679 (EDTA), 1 mg/mL lysozyme, 1 mM dithiothreitol, and 0.1% Triton X-100) supplemented  
680 with complete protease inhibitor cocktail (Thermo Scientific) for 1 h on ice. Nuclease was  
681 then added and the lysate was incubated for 1 h at ambient temperature under rotation. The  
682 lysates were centrifuged at 4°C for 10 min at 12,000 × g. Glutathione Sepharose 4B beads  
683 (Pierce Biotechnology, USA) were added to the clarified supernatants and the mixtures were  
684 incubated overnight at 4°C under rotation. The beads were washed with lysis buffer, followed  
685 by three washes with PBS, and then stored at 4°C in an equal volume of PBS.

#### 686 **Glutathione-S-transferase (GST) pull-down assay**

687 For the *in vitro* binding assay, Flag- or myc-tagged NCL, and RHDV p16, p23, and RdRp  
688 proteins were expressed in RK-13 cells. According to the manufacturer's instructions, the  
689 GST pull-down assay was performed by incubating 50 μL of a 50% slurry of glutathione  
690 Sepharose beads containing 25 μM GST fusion protein in lysis buffer with a 3-fold molar  
691 excess of prey protein (Pierce Biotechnology). RNase (Takara) was added to the cell lysis  
692 and wash buffers. The bound proteins were separated by SDS-PAGE and then subjected to  
693 western blot analysis.

#### 694 **Co-immunoprecipitation (Co-IP) analysis**

695 RK-13 cells were co-transfected with the bait and prey plasmids. At 48 h after  
696 transfection, total protein was isolated from RK-13 cells using IP lysis buffer. We conducted  
697 Co-IP analysis using a commercial Co-IP kit (Pierce Biotechnology), according to the

698 manufacturer's instructions. AminoLink Plus Coupling Resin (Thermo Scientific) was  
699 incubated with anti-myc monoclonal antibody (mAb) (Abcam, UK) or anti-Flag mAb  
700 (Abcam) and then subjected to SDS-PAGE. IB analysis of the proteins was subsequently  
701 conducted using mAbs against myc and Flag (Abcam). RNase was added to the cell lysis and  
702 wash buffers.

### 703 **Immunoblotting (IB) analysis**

704 Protein samples were separated on 12% gels and then transferred to nitrocellulose  
705 membranes (Hybond-C; Amersham Life Sciences, UK) using a semi-dry transfer apparatus  
706 (Bio-Rad Laboratories, USA). The membranes were blocked with 5% (w/v) nonfat milk in  
707 TBST buffer (150 mM NaCl, 20 mM Tris, and 0.1% Tween-20; pH 7.6) for 3 h at 4°C and  
708 then stained overnight at 4°C with a primary antibody (Ab). After washing three times for 10  
709 min each, the membranes were incubated with a secondary Ab against immunoglobulin G  
710 (IgG) conjugated to horseradish peroxidase (Sigma-Aldrich) in PBST buffer (137 mM NaCl,  
711 2.7 mM KCl, 10 mM Na<sub>2</sub>HPO<sub>4</sub>, 2 mM KH<sub>2</sub>PO<sub>4</sub> and 0.1% Tween-20; pH 7.4) for 1 h at room  
712 temperature (RT). Finally, after washing three times for 10 min each, the proteins were  
713 detected using an automatic chemiluminescence imaging analysis system (Tanon Science &  
714 Technology Co., Ltd., China).

### 715 **Immunofluorescence assay (IFA)**

716 Cells were fixed in 3.7% paraformaldehyde in PBS (pH 7.5) at RT for 30 min and  
717 subsequently permeabilized by incubation in methanol at -20°C for 30 min. The fixed cells  
718 were blocked with 5% (w/v) nonfat milk in PBST buffer for 3 h at 4°C and then stained with  
719 a primary Ab for 2 h at 37°C. After washing three times for 10 min each, the cells were  
720 incubated with a secondary Ab against IgG conjugated to fluorescein isothiocyanate (FITC)  
721 (Sigma-Aldrich) in PBST buffer for 1 h at room temperature. Finally, after washing three

722 times for 10 min each, the samples were observed under a fluorescence microscope equipped  
723 with a video documentation system (ZEISS, Germany).

#### 724 **Mass spectrometry**

725       Jingjie PTM BioLab Co., Ltd. (Hangzhou, China) performed all mass spectrometry  
726 analyses.

727

728

#### 729 **In vivo experiments**

730       Twenty 8-week-old male New Zealand rabbits seronegative for RHDV were randomly  
731 distributed into four groups (n = 5/group) and housed in individual ventilated cages. All  
732 experimental protocols were reviewed by the state ethics commission and were approved by  
733 the competent authority. Details of the protection assay are shown in Fig. 7F. All rabbits were  
734 challenged intramuscularly with 100 × the median lethal dose (LD50) of RHDV. Two hours  
735 after RHDV infection, rabbits were injected with the RdRp peptide (1 mg), p16 peptide (1  
736 mg), non-specific peptide (1 mg), or PBS, via the ear vein. The rabbits were clinically  
737 examined daily for 7 days post-challenge.

#### 738 **Statistical analyses**

739       Statistical analysis was performed using GraphPad Prism 6 software. Specific tests are  
740 described in the figure legends.

#### 741 **Acknowledgments**

742       We thank LetPub for its linguistic assistance during the preparation of this manuscript.

743



## 744 References

- 745 1. Meyers G, Wirblich C, Thiel HJ (1991) Rabbit hemorrhagic disease virus--molecular  
746 cloning and nucleotide sequencing of a calicivirus genome. *Virology* 184: 664-676.
- 747 2. Gregg DA, House C, Meyer R, Berninger M (1991) Viral haemorrhagic disease of rabbits in  
748 Mexico: epidemiology and viral characterization. *Rev Sci Tech* 10: 435-451.
- 749 3. Abrantes J, van der Loo W, Le Pendu J, Esteves PJ (2012) Rabbit haemorrhagic disease  
750 (RHD) and rabbit haemorrhagic disease virus (RHDV): a review. *Vet Res* 43: 12.
- 751 4. Zhu J, Miao Q, Tan Y, Guo H, Li C, et al. (2016) Extensive characterization of a lentiviral-  
752 derived stable cell line expressing rabbit hemorrhagic disease virus VPg protein. *J*  
753 *Virol Methods* 237: 86-91.
- 754 5. Zhu J, Wang B, Miao Q, Tan Y, Li C, et al. (2015) Viral Genome-Linked Protein (VPg) Is  
755 Essential for Translation Initiation of Rabbit Hemorrhagic Disease Virus (RHDV). *PLoS*  
756 *One* 10: e0143467.
- 757 6. Meyers G, Wirblich C, Thiel HJ (1991) Genomic and subgenomic RNAs of rabbit  
758 hemorrhagic disease virus are both protein-linked and packaged into particles.  
759 *Virology* 184: 677-686.
- 760 7. Wirblich C, Sibilina M, Boniotti MB, Rossi C, Thiel HJ, et al. (1995) 3C-like protease of rabbit  
761 hemorrhagic disease virus: identification of cleavage sites in the ORF1 polyprotein  
762 and analysis of cleavage specificity. *J Virol* 69: 7159-7168.
- 763 8. Morales M, Barcena J, Ramirez MA, Boga JA, Parra F, et al. (2004) Synthesis in vitro of  
764 rabbit hemorrhagic disease virus subgenomic RNA by internal initiation on (-)sense  
765 genomic RNA: mapping of a subgenomic promoter. *J Biol Chem* 279: 17013-17018.
- 766 9. Meyers G (2003) Translation of the minor capsid protein of a calicivirus is initiated by a  
767 novel termination-dependent reinitiation mechanism. *J Biol Chem* 278: 34051-34060.
- 768 10. Marin MS, Casais R, Alonso JM, Parra F (2000) ATP binding and ATPase activities  
769 associated with recombinant rabbit hemorrhagic disease virus 2C-like polypeptide. *J*  
770 *Virol* 74: 10846-10851.
- 771 11. Lopez Vazquez AL, Martin Alonso JM, Parra F (2001) Characterisation of the RNA-  
772 dependent RNA polymerase from Rabbit hemorrhagic disease virus produced in  
773 *Escherichia coli*. *Arch Virol* 146: 59-69.
- 774 12. den Boon JA, Ahlquist P (2010) Organelle-like membrane compartmentalization of  
775 positive-strand RNA virus replication factories. *Annu Rev Microbiol* 64: 241-256.
- 776 13. Nagy PD, Pogany J (2011) The dependence of viral RNA replication on co-opted host  
777 factors. *Nat Rev Microbiol* 10: 137-149.
- 778 14. Wang B, Zhe M, Chen Z, Li C, Meng C, et al. (2013) Construction and applications of  
779 rabbit hemorrhagic disease virus replicon. *PLoS One* 8: e60316.
- 780 15. Zhu J, Miao Q, Tan Y, Guo H, Liu T, et al. (2017) Inclusion of an Arg-Gly-Asp receptor-  
781 recognition motif into the capsid protein of rabbit hemorrhagic disease virus enables  
782 culture of the virus in vitro. *J Biol Chem* 292: 8605-8615.
- 783 16. Yi Z, Fang C, Zou J, Xu J, Song W, et al. (2016) Affinity Purification of the Hepatitis C  
784 Virus Replicase Identifies Valosin-Containing Protein, a Member of the ATPases  
785 Associated with Diverse Cellular Activities Family, as an Active Virus Replication  
786 Modulator. *J Virol* 90: 9953-9966.
- 787 17. Kümmerer BM (2018) Establishment and Application of Flavivirus Replicons. In:  
788 Hilgenfeld R, Vasudevan SG, editors. *Dengue and Zika: Control and Antiviral*  
789 *Treatment Strategies*. Singapore: Springer Singapore. pp. 165-173.
- 790 18. Khromykh AA, Varnavski AN, Sedlak PL, Westaway EG (2001) Coupling between  
791 replication and packaging of flavivirus RNA: evidence derived from the use of DNA-  
792 based full-length cDNA clones of Kunjin virus. *J Virol* 75: 4633-4640.

- 793 19. Hsieh TY, Matsumoto M, Chou HC, Schneider R, Hwang SB, et al. (1998) Hepatitis C  
794 virus core protein interacts with heterogeneous nuclear ribonucleoprotein K. *J Biol*  
795 *Chem* 273: 17651-17659.
- 796 20. Saxena V, Lai CK, Chao TC, Jeng KS, Lai MM (2012) Annexin A2 is involved in the  
797 formation of hepatitis C virus replication complex on the lipid raft. *J Virol* 86: 4139-  
798 4150.
- 799 21. Kovalev N, Nagy PD (2014) The expanding functions of cellular helicases: the  
800 tombusvirus RNA replication enhancer co-opts the plant eIF4AIII-like AtRH2 and the  
801 DDX5-like AtRH5 DEAD-box RNA helicases to promote viral asymmetric RNA  
802 replication. *PLoS Pathog* 10: e1004051.
- 803 22. Zhang C, He L, Kang K, Chen H, Xu L, et al. (2014) Screening of cellular proteins that  
804 interact with the classical swine fever virus non-structural protein 5A by yeast two-  
805 hybrid analysis. *J Biosci* 39: 63-74.
- 806 23. Dorobantu CM, Albulescu L, Harak C, Feng Q, van Kampen M, et al. (2015) Modulation  
807 of the Host Lipid Landscape to Promote RNA Virus Replication: The Picornavirus  
808 Encephalomyocarditis Virus Converges on the Pathway Used by Hepatitis C Virus.  
809 *PLoS Pathog* 11: e1005185.
- 810 24. Jia W, Yao Z, Zhao J, Guan Q, Gao L (2017) New perspectives of physiological and  
811 pathological functions of nucleolin (NCL). *Life Sci* 186: 1-10.
- 812 25. Tuteja R, Tuteja N (1998) Nucleolin: a multifunctional major nucleolar phosphoprotein.  
813 *Crit Rev Biochem Mol Biol* 33: 407-436.
- 814 26. Abdelmohsen K, Gorospe M (2012) RNA-binding protein nucleolin in disease. *RNA Biol* 9:  
815 799-808.
- 816 27. Bicknell K, Brooks G, Kaiser P, Chen H, Dove BK, et al. (2005) Nucleolin is regulated  
817 both at the level of transcription and translation. *Biochem Biophys Res Commun* 332:  
818 817-822.
- 819 28. Hirano K, Miki Y, Hirai Y, Sato R, Itoh T, et al. (2005) A multifunctional shuttling protein  
820 nucleolin is a macrophage receptor for apoptotic cells. *J Biol Chem* 280: 39284-  
821 39293.
- 822 29. Becherel OJ, Gueven N, Birrell GW, Schreiber V, Suraweera A, et al. (2006) Nucleolar  
823 localization of aprataxin is dependent on interaction with nucleolin and on active  
824 ribosomal DNA transcription. *Hum Mol Genet* 15: 2239-2249.
- 825 30. Mongelard F, Bouvet P (2007) Nucleolin: a multiFACeTed protein. *Trends Cell Biol* 17:  
826 80-86.
- 827 31. Durut N, Saez-Vasquez J (2015) Nucleolin: dual roles in rDNA chromatin transcription.  
828 *Gene* 556: 7-12.
- 829 32. Shimakami T, Honda M, Kusakawa T, Murata T, Shimotohno K, et al. (2006) Effect of  
830 hepatitis C virus (HCV) NS5B-nucleolin interaction on HCV replication with HCV  
831 subgenomic replicon. *J Virol* 80: 3332-3340.
- 832 33. Strang BL, Boulant S, Coen DM (2010) Nucleolin associates with the human  
833 cytomegalovirus DNA polymerase accessory subunit UL44 and is necessary for  
834 efficient viral replication. *J Virol* 84: 1771-1784.
- 835 34. Cancio-Lonches C, Yocupicio-Monroy M, Sandoval-Jaime C, Galvan-Mendoza I, Urena L,  
836 et al. (2011) Nucleolin interacts with the feline calicivirus 3' untranslated region and  
837 the protease-polymerase NS6 and NS7 proteins, playing a role in virus replication. *J*  
838 *Virol* 85: 8056-8068.
- 839 35. Strang BL, Boulant S, Kirchhausen T, Coen DM (2012) Host cell nucleolin is required to  
840 maintain the architecture of human cytomegalovirus replication compartments. *MBio*  
841 3.
- 842 36. Bender BJ, Coen DM, Strang BL (2014) Dynamic and nucleolin-dependent localization of  
843 human cytomegalovirus UL84 to the periphery of viral replication compartments and  
844 nucleoli. *J Virol* 88: 11738-11747.

- 845 37. Chen YL, Liu CD, Cheng CP, Zhao B, Hsu HJ, et al. (2014) Nucleolin is important for  
846 Epstein-Barr virus nuclear antigen 1-mediated episome binding, maintenance, and  
847 transcription. *Proc Natl Acad Sci U S A* 111: 243-248.
- 848 38. Kumar D, Broor S, Rajala MS (2016) Interaction of Host Nucleolin with Influenza A Virus  
849 Nucleoprotein in the Early Phase of Infection Limits the Late Viral Gene Expression.  
850 *PLoS One* 11: e0164146.
- 851 39. Terrier O, Carron C, De Chasse B, Dubois J, Traversier A, et al. (2016) Nucleolin  
852 interacts with influenza A nucleoprotein and contributes to viral ribonucleoprotein  
853 complexes nuclear trafficking and efficient influenza viral replication. *Sci Rep* 6:  
854 29006.
- 855 40. Gao Z, Hu J, Wang X, Yang Q, Liang Y, et al. (2018) The PA-interacting host protein  
856 nucleolin acts as an antiviral factor during highly pathogenic H5N1 avian influenza  
857 virus infection. *Arch Virol*.
- 858 41. Machin A, Martin Alonso JM, Dalton KP, Parra F (2009) Functional differences between  
859 precursor and mature forms of the RNA-dependent RNA polymerase from rabbit  
860 hemorrhagic disease virus. *J Gen Virol* 90: 2114-2118.
- 861 42. Urakova N, Frese M, Hall RN, Liu J, Matthaai M, et al. (2015) Expression and partial  
862 characterisation of rabbit haemorrhagic disease virus non-structural proteins.  
863 *Virology* 484: 69-79.
- 864 43. Leen EN, Sorgeloos F, Correia S, Chaudhry Y, Cannac F, et al. (2016) A Conserved  
865 Interaction between a C-Terminal Motif in Norovirus VPg and the HEAT-1 Domain of  
866 eIF4G Is Essential for Translation Initiation. *PLoS Pathog* 12: e1005379.
- 867 44. Fernandez-Vega V, Sosnovtsev SV, Belliot G, King AD, Mitra T, et al. (2004) Norwalk  
868 virus N-terminal nonstructural protein is associated with disassembly of the Golgi  
869 complex in transfected cells. *J Virol* 78: 4827-4837.
- 870 45. Bailey D, Kaiser WJ, Hollinshead M, Moffat K, Chaudhry Y, et al. (2010) Feline calicivirus  
871 p32, p39 and p30 proteins localize to the endoplasmic reticulum to initiate replication  
872 complex formation. *Journal of General Virology* 91: 739-749.
- 873 46. Hyde JL, Mackenzie JM (2010) Subcellular localization of the MNV-1 ORF1 proteins and  
874 their potential roles in the formation of the MNV-1 replication complex. *Virology* 406:  
875 138-148.
- 876 47. Chen J, Guo K, Kastan MB (2012) Interactions of nucleolin and ribosomal protein L26  
877 (RPL26) in translational control of human p53 mRNA. *J Biol Chem* 287: 16467-16476.
- 878 48. Ahlquist P, Noueiry AO, Lee WM, Kushner DB, Dye BT (2003) Host factors in positive-  
879 strand RNA virus genome replication. *J Virol* 77: 8181-8186.
- 880 49. Subba-Reddy CV, Yunus MA, Goodfellow IG, Kao CC (2012) Norovirus RNA synthesis is  
881 modulated by an interaction between the viral RNA-dependent RNA polymerase and  
882 the major capsid protein, VP1. *J Virol* 86: 10138-10149.
- 883 50. Thackray LB, Duan E, Lazear HM, Kambal A, Schreiber RD, et al. (2012) Critical role for  
884 interferon regulatory factor 3 (IRF-3) and IRF-7 in type I interferon-mediated control  
885 of murine norovirus replication. *J Virol* 86: 13515-13523.
- 886 51. Thorne LG, Goodfellow IG (2014) Norovirus gene expression and replication. *J Gen Virol*  
887 95: 278-291.
- 888 52. Li TF, Hosmillo M, Schwanke H, Shu T, Wang Z, et al. (2018) Human Norovirus NS3 Has  
889 RNA Helicase and Chaperoning Activities. *J Virol* 92.
- 890 53. Oliveira LM, Blawid R, Orilio AF, Andrade BYG, Souza ACA, et al. (2018) Development of  
891 an infectious clone and replicon system of norovirus GII.4. *J Virol Methods* 258: 49-  
892 53.
- 893 54. Urakova N, Warden AC, White PA, Strive T, Frese M (2017) A Motif in the F Homomorph  
894 of Rabbit Haemorrhagic Disease Virus Polymerase Is Important for the Subcellular  
895 Localisation of the Protein and Its Ability to Induce Redistribution of Golgi  
896 Membranes. *Viruses* 9.

- 897 55. Urakova N, Strive T, Frese M (2017) RNA-Dependent RNA Polymerases of Both Virulent  
898 and Benign Rabbit Caliciviruses Induce Striking Rearrangement of Golgi Membranes.  
899 PLOS ONE 12: e0169913.
- 900 56. Fan B, Lu KY, Reymond Sutandy FX, Chen YW, Konan K, et al. (2014) A human  
901 proteome microarray identifies that the heterogeneous nuclear ribonucleoprotein K  
902 (hnRNP K) recognizes the 5' terminal sequence of the hepatitis C virus RNA. Mol Cell  
903 Proteomics 13: 84-92.
- 904 57. Nüesch JPF, Rommelaere J (2006) NS1 Interaction with CKII $\alpha$ : Novel Protein Complex  
905 Mediating Parvovirus-Induced Cytotoxicity. Journal of Virology 80: 4729-4739.
- 906 58. Maggi LB, Jr., Kuchenruether M, Dadey DY, Schwoppe RM, Grisendi S, et al. (2008)  
907 Nucleophosmin serves as a rate-limiting nuclear export chaperone for the  
908 Mammalian ribosome. Mol Cell Biol 28: 7050-7065.
- 909 59. Robledo S, Idol RA, Crimmins DL, Ladenson JH, Mason PJ, et al. (2008) The role of  
910 human ribosomal proteins in the maturation of rRNA and ribosome production. RNA  
911 14: 1918-1929.
- 912 60. Aminev AG, Amineva SP, Palmenberg AC (2003) Encephalomyocarditis viral protein 2A  
913 localizes to nucleoli and inhibits cap-dependent mRNA translation. Virus Res 95: 45-  
914 57.
- 915 61. Tayyari F, Marchant D, Moraes TJ, Duan W, Mastrangelo P, et al. (2011) Identification of  
916 nucleolin as a cellular receptor for human respiratory syncytial virus. Nat Med 17:  
917 1132-1135.
- 918 62. Su PY, Wang YF, Huang SW, Lo YC, Wang YH, et al. (2015) Cell surface nucleolin  
919 facilitates enterovirus 71 binding and infection. J Virol 89: 4527-4538.
- 920 63. Balinsky CA, Schmeisser H, Ganesan S, Singh K, Pierson TC, et al. (2013) Nucleolin  
921 interacts with the dengue virus capsid protein and plays a role in formation of  
922 infectious virus particles. J Virol 87: 13094-13106.
- 923 64. Zhu J, Miao Q, Tang J, Wang X, Dong D, et al. (2018) Nucleolin mediates the  
924 internalization of rabbit hemorrhagic disease virus through clathrin-dependent  
925 endocytosis. PLoS Pathog 14: e1007383.
- 926 65. Waggoner S, Sarnow P (1998) Viral ribonucleoprotein complex formation and nucleolar-  
927 cytoplasmic relocalization of nucleolin in poliovirus-infected cells. J Virol 72: 6699-  
928 6709.
- 929 66. Sagou K, Uema M, Kawaguchi Y (2010) Nucleolin is required for efficient nuclear egress  
930 of herpes simplex virus type 1 nucleocapsids. J Virol 84: 2110-2121.
- 931 67. Shannon P, Markiel A, Ozier O, Baliga NS, Wang JT, et al. (2003) Cytoscape: a software  
932 environment for integrated models of biomolecular interaction networks. Genome  
933 Res 13: 2498-2504.

934

935

## 936 **Figure legends**

937 **Figure 1. Tagging of RHDV RdRp in the viral replicon. (A)** Schematic of RHDV-His/HA  
938 replicon constructs. The HA and 6 $\times$ His peptide sequences are inserted into the RdRp aa  
939 sequence at 25, 82, 442, or 483 sites, respectively. **(B, D)** Effect of the inserted tag on viral

940 replicon activity. RK-13 cells were transfected with recombinant RHDV replicons.  
941 Luciferase activity in cell lysates was measured at 48 hpt. Student *t*-tests and analysis of  
942 variance were used for statistical analyses. \**p* < 0.05 and \*\**p* < 0.01. The number of cells  
943 used in all replicate experiments was similar. (C, E) Western blotting of recombinant RHDV  
944 replicons in RK-13 cells with the antibodies indicated.  $\beta$ -actin was used as an internal control.  
945

946 **Figure 2. Affinity purification of solubilized RHDV replicase RdRp-associated host**  
947 **factors. (A)** Schematic of two-step affinity purification of the RHDV replicase RdRp-  
948 associated host proteins. **(B)** After two-step affinity purification, the eluted proteins were  
949 resolved by SDS-PAGE. Specifically, enriched protein bands (arrows) in the RHDV-His/HA-  
950 luc sample were identified by mass spectrometry. Mainly, host proteins and identified viral  
951 proteins in the bands indicated are shown. Host factors selected for further study are marked  
952 in red. **(C)** Network analysis of RHDV replicase-associated protein. The interaction network  
953 shows the proteins identified as being associated with RHDV replicase by affinity  
954 purification. To simplify these interdependencies, host factors that did not interact with other  
955 factors in the network are not shown. NCL is marked in red. Proteins that interact with NCL  
956 are labeled in yellow. Note: the network was generated using the data presented in Table 1.  
957 The interaction network was generated using the STRING online tool and then presented  
958 using Cytoscape software [67].

959

960 **Figure 3. NCL is involved in RHDV replication. (A)** The effect of NCL eukaryotic  
961 plasmids on viral replicon activity. Relative luciferase activity was evaluated in RK-13 cells  
962 carrying pRHDV-luc, and trans-supplemented NCL eukaryotic plasmids pFlag-NCL (0.2  $\mu$ g,  
963 0.4  $\mu$ g) at 24 hpt and 48 hpt. The p3  $\times$  Flag-CMV-14 vector acted as negative control. The  
964 luciferase activity in RK-13 cells was evaluated by measuring Fluc activity. Rluc activity was

## NCL is essential for RHDV replication

965 measured to normalize the transfection efficiency. **(B)** The effect of NCL siRNA on viral  
966 replicon activity. The RK-13 cells, co-transfected with pRHDV-luc and NCL siRNA (20  
967 pmol, 40 pmol, 60 pmol, or 80 pmol), were lysed at 24 hpt and 48 hpt, and Fluc activity was  
968 measured based on RLU and normalized according to the results obtained for a co-  
969 transfected pLTK plasmid encoding Rluc. The nonspecific siRNA acted as negative control.  
970 **(C-D)** The effect of NCL on mRHDV replication. The RK-13 cells, transfected with pFlag-  
971 NCL(1 $\mu$ g, 2 $\mu$ g) or NCL siRNA (40 pmol, 80 pmol), were infected with mRHDV (MOI = 1)  
972 at 24 hpt, and the level of mRHDV replication were evaluated by WB and qRT-PCR at 48  
973 hpi. The p3  $\times$  Flag-CMV-14 vector and nonspecific siRNA acted as negative control. **(E-F)**  
974 The replication ability of mRHDV in RK-NCL cells. The expression level of NCL in RK-  
975 NCL cells at 10 passages was determined by western blot analysis with anti-Flag mAb. The  
976 RHDV replication levels in RK-NCL cells infected with mRHDV (MOI = 1) were evaluated  
977 by WB and qRT-PCR at 48 hpi. RK-GFP cells acted as negative controls; RK-13 cells acted  
978 as blank controls. Student *t*-tests and analysis of variance were used for statistical analyses.  
979 \**p* < 0.05 and \*\**p* < 0.01. The number of cells used in all replicate experiments was similar.

980

981 **Figure 4. NCL interacts with RHDV RdRp.** **(A)** M2H interaction of NCL with RHDV  
982 nonstructural proteins. Student *t*-tests and analysis of variance were used for statistical  
983 analyses. \**p* < 0.05 and \*\**p* < 0.01. The number of cells used in all replicate experiments was  
984 similar. **(B)** NCL binds to RdRp, p16 and p23 during RHDV replication. An IP assay was  
985 performed on cell lysates using NCL mAb in RK-13 cells that were infected or uninfected  
986 with mRHDV, then immunoblotted with Abs against NCL, RdRp, p16 or p23.  $\beta$ -actin was  
987 used as an internal control. Cells uninfected with mRHDV served as negative controls. **(C)**  
988 Validation of the interaction of RHDV RdRp with NCL in a Co-IP assay. RK-13 cells were  
989 co-transfected with the indicated plasmids (+) or empty vectors (-). At 48 hpt, cells were

NCL is essential for RHDV replication

---

990 lysed, and IP of myc-fused proteins was performed using anti-myc mAb. Lysates (input) and  
991 IPs were analyzed with IB using antibody against myc or Flag.  $\beta$ -actin was used as an  
992 internal control. **(D)** Confocal microscopy analysis of NCL (green) and RdRp (red) in RK-13  
993 cells infected with mRHDV at 24 hpi with mAbs against NCL and RdRp. The small white  
994 boxes represent amplified random co-localization spots within the merged image, and the co-  
995 localization spots are indicated with white arrowheads. **(E–F)** The functional domain of NCL  
996 interacting with RdRp was identified by GST pull-down assay. GST fusions of various NCL  
997 domains were used as bait; RdRp expressed in RK-13 cells, obtained at 48 hpt with pRdRp-  
998 myc plasmids, was used as prey. RdRp binding was immunoblotted with anti-myc mAb. The  
999 GST protein acted as a negative control. **(G–I)** IB analysis of the glutathione affinity pull-  
1000 down assays was performed to map the binding domain of the RdRp protein. We used GST-  
1001 tagged RdRp domains as bait and NCL expressed in RK-13 cells as prey. After extensive  
1002 washing, NCL binding was determined by IB with anti-Flag mAb. The GST protein acted as  
1003 a negative control. The interactions are shown in red. **(J)** Modeling of the functional area of  
1004 NCL-RdRp interaction.

1005

1006 **Figure 5. NCL interacts with RHDV p16.** **(A)** We identified the interaction between RHDV  
1007 p16 and NCL using Co-IP assay. RK-13 cells were co-transfected with the indicated plasmids  
1008 (+) or empty vectors (-). Cell lysates were prepared 48 h post-transfection and the proteins  
1009 were subjected to IP followed by IB analysis. **(B)** Confocal microscopy analysis of NCL  
1010 (green) and RdRp (red) in RK-13 cells infected with mRHDV at 24 hpi with Abs against  
1011 NCL and p16. The small white boxes represent amplified random co-localization spots within  
1012 the merged image, and the co-localization spots are indicated with white arrowheads. **(C–D)**  
1013 The functional domain of NCL interacting with p16 was identified by GST pull-down assays.  
1014 GST fusions of various NCL domains were used as bait, and myc fusion-p16 proteins

1015 expressed in RK-13 cells, were used as prey. p16 binding was immunoblotted with anti-myc  
1016 mAb. The GST protein acted as a negative control. **(E–G)** Glutathione affinity pull-down  
1017 assays were performed to map the binding domain of p16 protein. We used GST-tagged p16  
1018 domains as bait and Flag fusion-NCL proteins expressed in RK-13 cells as prey. After  
1019 extensive washing, NCL binding was determined by IB with anti-Flag mAb. The GST  
1020 protein acted as a negative control. The interactions are shown in red.

1021

1022 **Figure 6. NCL interacts with RHDV p23.** **(A)** Co-IP of RHDV p23 with NCL in RK-13  
1023 cells. RK-13 cells were transfected with the indicated plasmids (+) (myc-p23 or Flag-NCL)  
1024 and empty vectors (-) for 48 h. Cell lysates were incubated with anti-myc mAb-coated beads  
1025 and Co-IP proteins were subjected to IB analysis. **(B)** Confocal microscopy analysis of NCL  
1026 (green) and p23 (red) in RK-13 cells infected with mRHDV at 24 hpi with Abs against NCL  
1027 and p23. The small white box represents amplified random co-localization spots within the  
1028 merged image, and the co-localization spot is indicated with a white arrowhead. **(C–D)** The  
1029 functional domain of NCL interacting with p23 was identified using GST pull-down assays.  
1030 GST fusions of various NCL domains were used as bait, and myc fusion-p23 proteins  
1031 expressed in RK-13 cells were used as prey. p23 binding was immunoblotted with anti-myc  
1032 mAb. The GST protein acted as a negative control. **(E–F)** Glutathione affinity pull-down  
1033 assays were performed to map the binding domain of p23 protein. We used GST-tagged p23  
1034 domains as bait and Flag fusion-NCL proteins expressed in RK-13 cells as prey. After  
1035 extensive washing, NCL binding was determined by IB with anti-Flag mAb. The GST  
1036 protein acted as a negative control. The interactions are shown in red. **(G)** Modeling of the  
1037 functional area of NCL-p23 interaction.

1038



1039 **Figure 7. Interactions between NCL and RdRp, p16, and p23 are required for RHDV**  
1040 **replication. (A)** The RHDV replicon and its mutants were transfected with RK-13 cells for  
1041 24 h and then lysed to detect luciferase activity in the lysate. Rluc activity was measured to  
1042 normalize the transfection efficiency. **(B)** Relative luciferase activity in RK-NCL-NTD cells,  
1043 RK-NCL-RBD cells, and RK-NCL-CTD cells carrying pRHDV-luc at 12, 24, 36, 48, 60, and  
1044 72 h post-transfection. RK-NCL cells acted as positive controls; RK-GFP cells acted as  
1045 negative controls; RK-13 cells acted as blank controls. **(C)** RHDV mRNA levels in RK-NCL  
1046 cells infected with mRHDV (MOI = 0.1) were evaluated by qRT-PCR at 12, 24, 36, 48, 60,  
1047 and 72 hpi. RK-GFP cells acted as negative controls; RK-13 cells acted as blank controls. **(D)**  
1048 Relative luciferase activity was evaluated in RK-13 cells carrying pRHDV-luc, treated with  
1049 p16 peptide, RdRp peptide, non-specific peptide, or PBS, at 24 hpt. The non-specific peptide  
1050 and PBS acted as negative controls. **(E)** The effect of RK-13 cell treated with p16 peptide,  
1051 RdRp peptide, non-specific peptide or PBS on RHDV replication. The mRNA levels in RK-  
1052 13 cells infected with mRHDV (MOI = 0.1) were evaluated by qRT-PCR at 24 hpi. Student *t*-  
1053 tests and analysis of variance were used for statistical analyses. \**p* < 0.05 and \*\**p* < 0.01.  
1054 The number of cells used in all replicate experiments was similar. **(F)** Schematic diagram of  
1055 animal experiments. **(G)** Survival of rabbits infected with RHDV JX/CHA/97. All rabbits  
1056 were challenged intramuscularly with 100 LD50 of RHDV. At 2 hpi, rabbits were injected  
1057 with RdRp peptide (1 mg), p16 peptide (1 mg), non-specific peptide (1 mg), or PBS, via the  
1058 ear vein, and subsequently clinically examined daily for 7 days.

1059

1060 **Figure 8. Identification of interactions between RHDV nonstructural proteins and host**  
1061 **factors of RCs. (A)** Identification of these interactions by M2H assays. Bait and prey  
1062 plasmids were co-transfected with pG5luc plasmids into subconfluent 293T cells at a molar  
1063 ratio of 1:1:1 for the pACT: pBIND: pG5luc vector. At 48 h after transfection, the 293T cells

1064 were lysed, and Rluc and Fluc activities were evaluated using the Promega Dual-Luciferase  
1065 Reporter Assay System. Student *t*-tests and analysis of variance were used for statistical  
1066 analyses. \**p* < 0.05 and \*\**p* < 0.01. The number of cells used in all replicate experiments was  
1067 similar. **(B)** These interactions were verified using Co-IP assays. RK-13 cells were co-  
1068 transfected with bait and prey plasmids. Cell lysates were prepared 48 h post-transfection and  
1069 the proteins were subjected to IP followed by IB analysis. myc fusion proteins acted as bait  
1070 proteins and Flag fusion proteins acted as prey proteins. **(C)** Effect of RdRp peptide and NCL  
1071 siRNA on p23 and p16 in the RHDV RC. A series of HA tag affinity purification analyses  
1072 were performed by transfection with the RHDV-luc-His/HA replicon in RK-13 cells, which  
1073 were treated with RdRp peptide, NCL siRNA or PBS respectively, and in RK-NCL cells.  
1074 Subsequently, the eluate proteins were subjected to IB analysis using RdRp, p16, p23 or NCL  
1075 antibodies. PBS acted as a negative control;  $\beta$ -actin acted as an internal control. **(D)** RdRp  
1076 peptide and NCL siRNA inhibited the formation of the RHDV RC. After HA tag affinity  
1077 purification, the eluted proteins were resolved by SDS-PAGE. The protein bands were  
1078 visualized with silver staining. PBS acted as a negative control;  $\beta$ -actin acted as an internal  
1079 control and was detected by IB with mAb against  $\beta$ -actin.

1080

1081 **Figure 9. Schematic of the role of NCL in RHDV replication.** (1) RHDV is internalized  
1082 into the cell. (2) Uncoating of the viral genome. (3) Translation of the polyprotein precursor.  
1083 (4) Polyproteins are cleaved into nonstructural and structural proteins. (5) RHDV genomic  
1084 RNA is replicated in the RC. (6) Assembly of the structural proteins and genomic RNA.  
1085 Components within the dashed line are the main components of the RHDV RC. The two-way  
1086 arrow represents interaction between the two proteins.

1087

1088 **Supporting information**

1089 **S1 Fig. RHDV RdRp protein structure analysis.** For clarity, the structure of the RHDV  
1090 RdRp was obtained from the Protein Data Bank under the identification number 1khv  
1091 (<https://www.rcsb.org/>). The structure of the RdRp mutation, as predicted by the SWISS-  
1092 MODEL online tool (<https://www.swissmodel.expasy.org/>) and based on homology  
1093 molecules found in the Protein Data Bank. The orange portion indicated by the red arrow is  
1094 the inserted label.

1095 **S2 Fig. Effect of NCL siRNA on RK-13 cells.** (A) After RK-13 cells were transfected with  
1096 different amounts of NCL siRNA for 24 h, the number and activity of viable cells were  
1097 detected using CCK-8. (B) In different doses of NCL siRNA-treated RK-13 cells, we  
1098 transfected the RHDV replicon reference plasmid pRluc. After 24 hpt, cell lysates were  
1099 collected and the activity of Rluc was detected using a dual luciferase reporter system.  
1100 Student t-tests and analysis of variance were used for statistical analyses. \* $p < 0.05$  and \*\* $p <$   
1101  $0.01$ . The number of cells used in all replicate experiments was similar.

1102 **S3 Fig. Alignments of amino acid sequences of G1.1a–G1.2 genogroups of RHDV.** (A)  
1103 Alignments of amino acid sequences 448–478 of RdRp protein of G1.1a–G1.2 genogroups of  
1104 RHDV. The representative strains used in the alignments are G1.1a: RHDV strain

NCL is essential for RHDV replication

---

1105 JX/CHA/97 (GenBank accession no. DQ205345.1) and RHDV isolate  
1106 K5\_08Q712\_BatchRelease1/2008 (GenBank accession no. MF598301); G1.1b: RHDV strain  
1107 CB194\_Pt (GenBank accession no. JX886001) and RHDV-SD (GenBank accession no.  
1108 Z29514.1); G1.1c: RHDV isolate BlueGums-2 (GenBank accession no. KT280058) and  
1109 RHDV isolate AUS/NSW/OUR-1/2014/06 (GenBank accession no. KY628318); G1.1d:  
1110 RHDV-FRG (GenBank accession no. M67473) and RHDV-FRG/2000 (GenBank accession  
1111 no. NC001543); G1.2: RHDV isolate CBA Algarve14-1 (GenBank accession no. KM115714)  
1112 and RHDV isolate BLMT-1 (GenBank accession no. KT280060). Sequence alignment was  
1113 performed with the ClustalW algorithm (<http://www.clustal.org/>). The conserved NCL-  
1114 binding motif is boxed. Selected amino acids from this motif are indicated with RHDV RdRp  
1115 numbering. **(B)** Alignments of representative amino acid sequences of the p16 protein of  
1116 G1.1a–G1.2 genogroups of RHDV. Sequence alignment was performed with the ClustalW  
1117 algorithm. The conserved NCL-binding motif is boxed. Selected amino acids from this motif  
1118 are indicated with RHDV p16 numbering. **(C)** Alignments of representative amino acid  
1119 sequences of p23 protein of G1.1a–G1.2 genogroups of RHDV. Sequence alignment was  
1120 performed with the ClustalW algorithm. The conserved NCL-binding motif is boxed.  
1121 Selected amino acids from this motif are indicated with RHDV p23 numbering.

1122 **S4 Fig. Expression level of the domain of NCL in overexpression cells. (A)** The positive  
1123 rate of cells was observed under a fluorescence microscope. GFP-fused NCL domain (NTD,

1124 RBD, or CTD) was expressed in RK13-NCL-NTD, RK13-NCL-RBD, and RK13-NCL-CTD  
1125 cells, respectively. **(B)** The expression level of the domains of NCL in the overexpression  
1126 cells at 10 passages were determined by western blot analysis with anti-Flag mAb. RK13-  
1127 GFP cells were used as positive control.  $\beta$ -actin was used as an internal control.

1128 **S1 Table. Plasmid construct details.**

1129 (XLSX)

1130 **S2 Table. Oligonucleotide primer sequences.**

1131 (XLSX)

1132 **S3 Table. Details of protein expression.**

1133 (XLSX)

1134

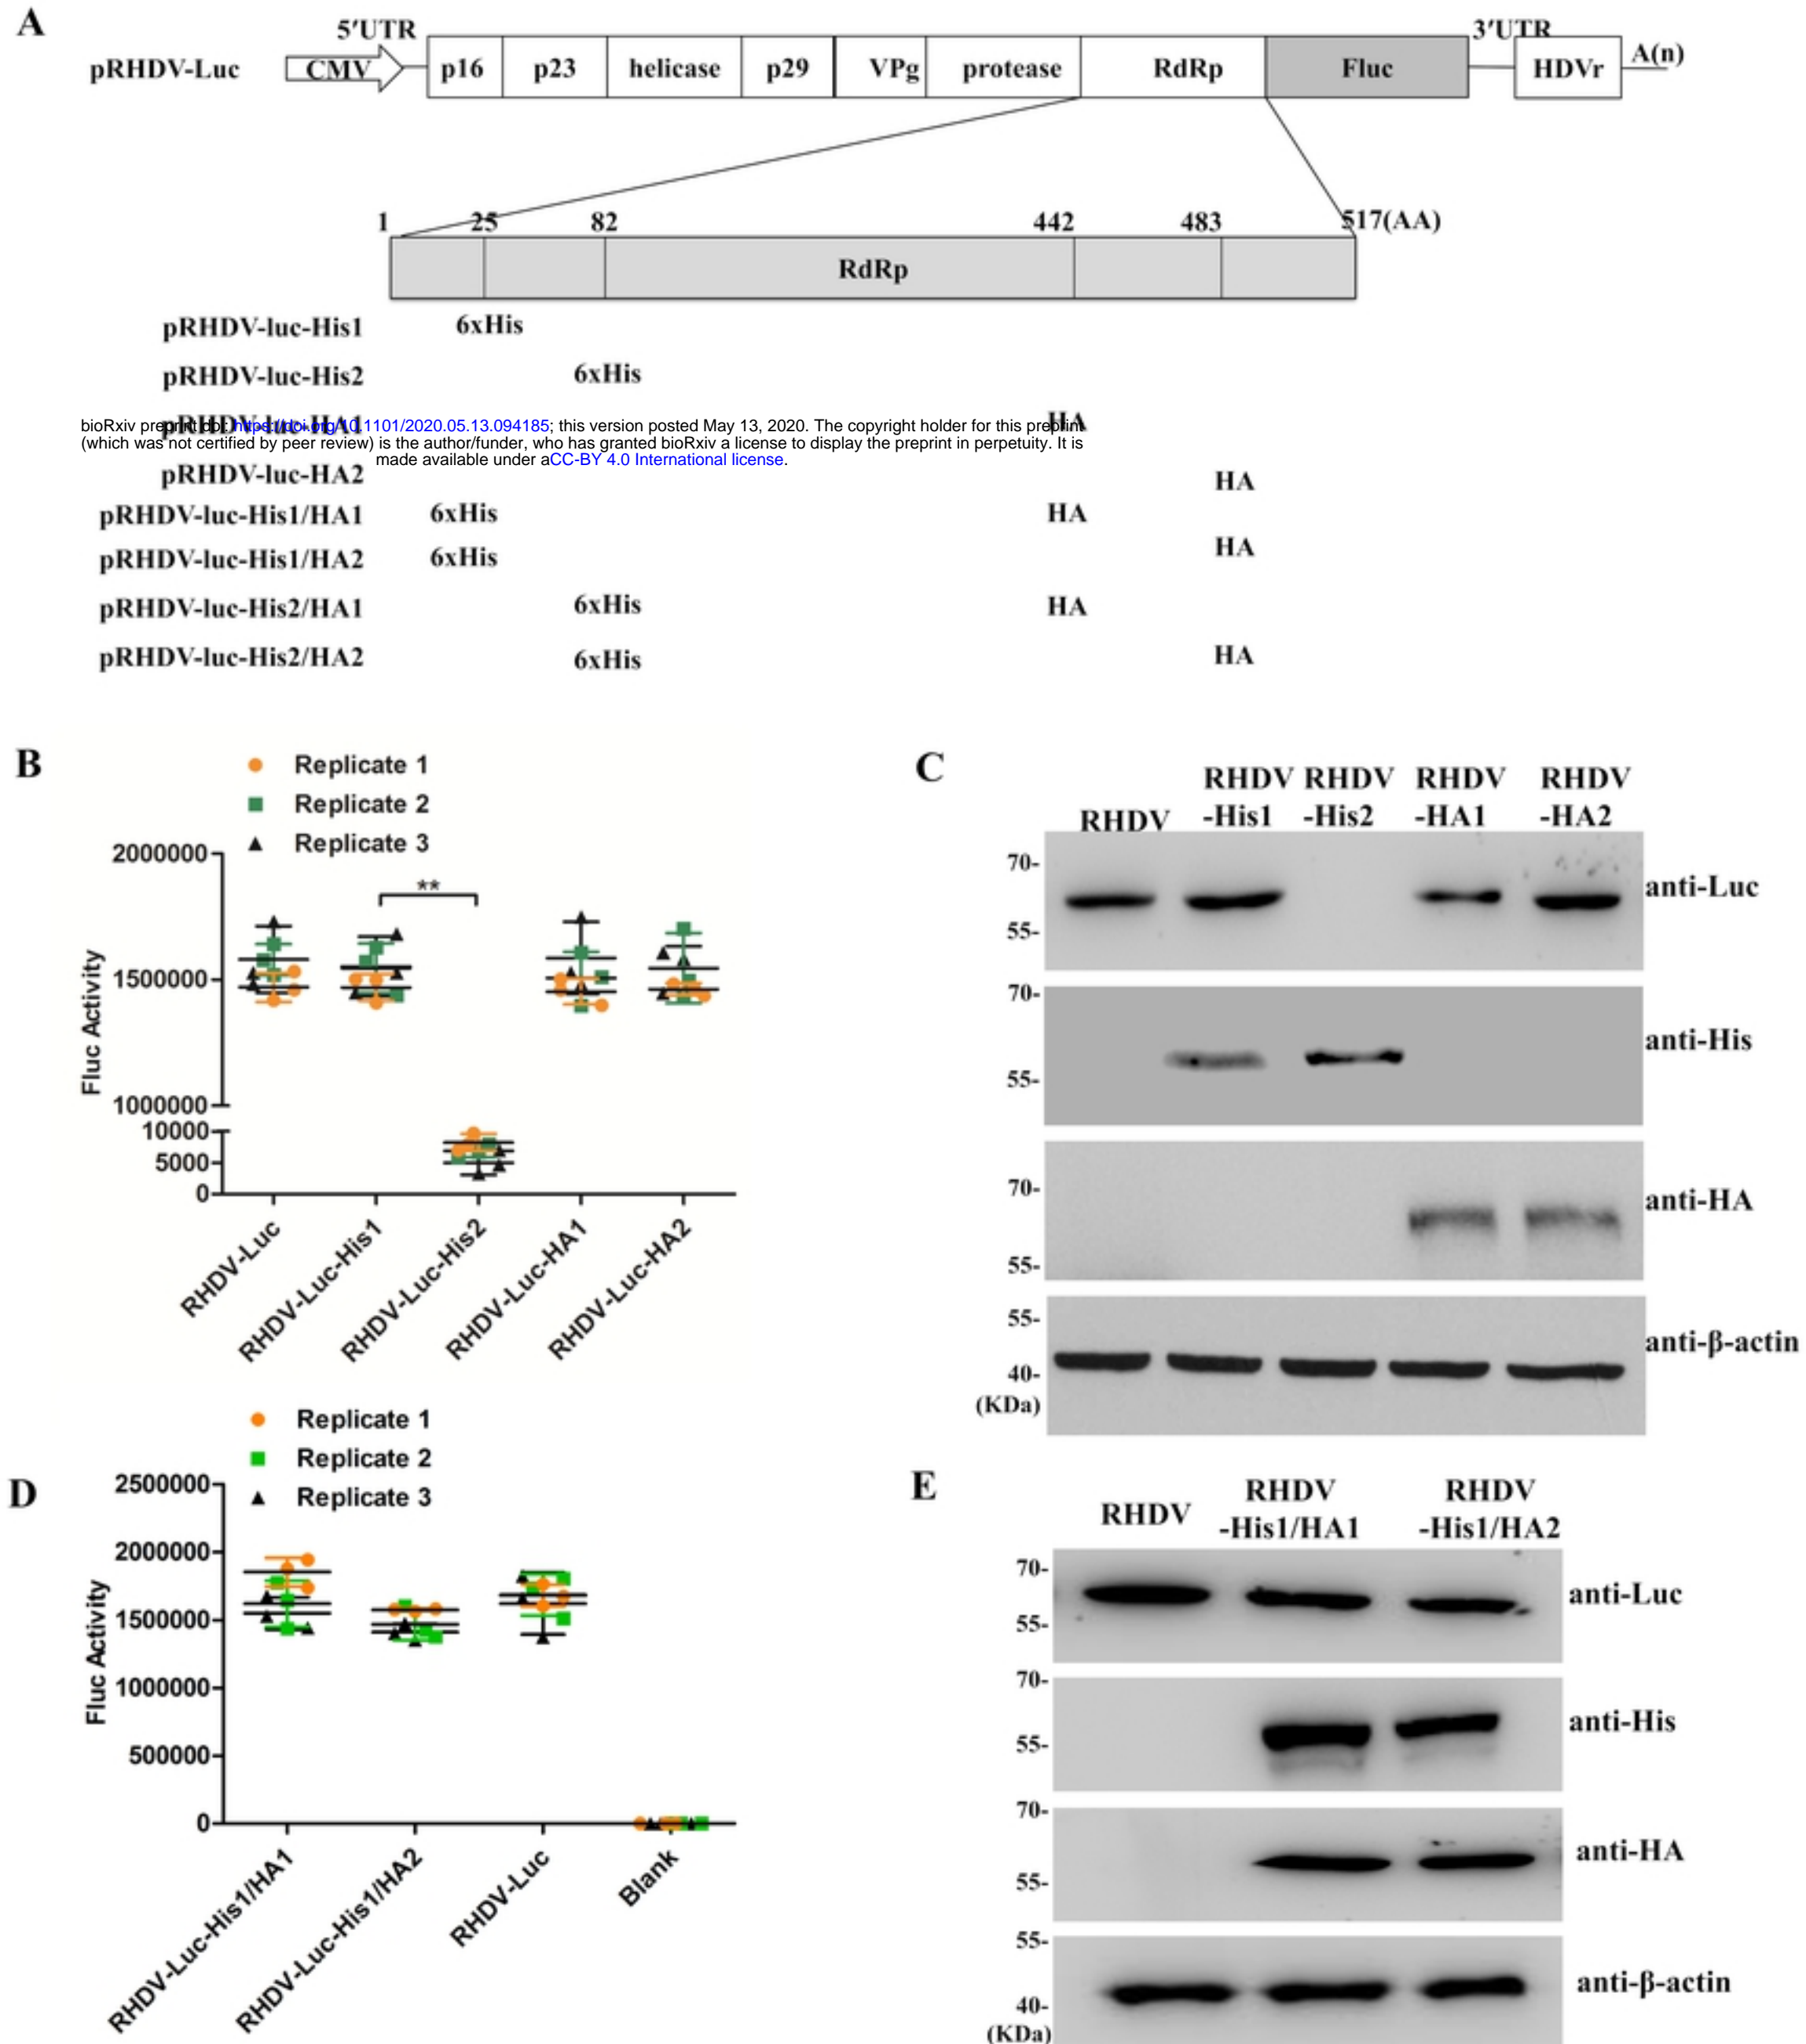

Fig 1

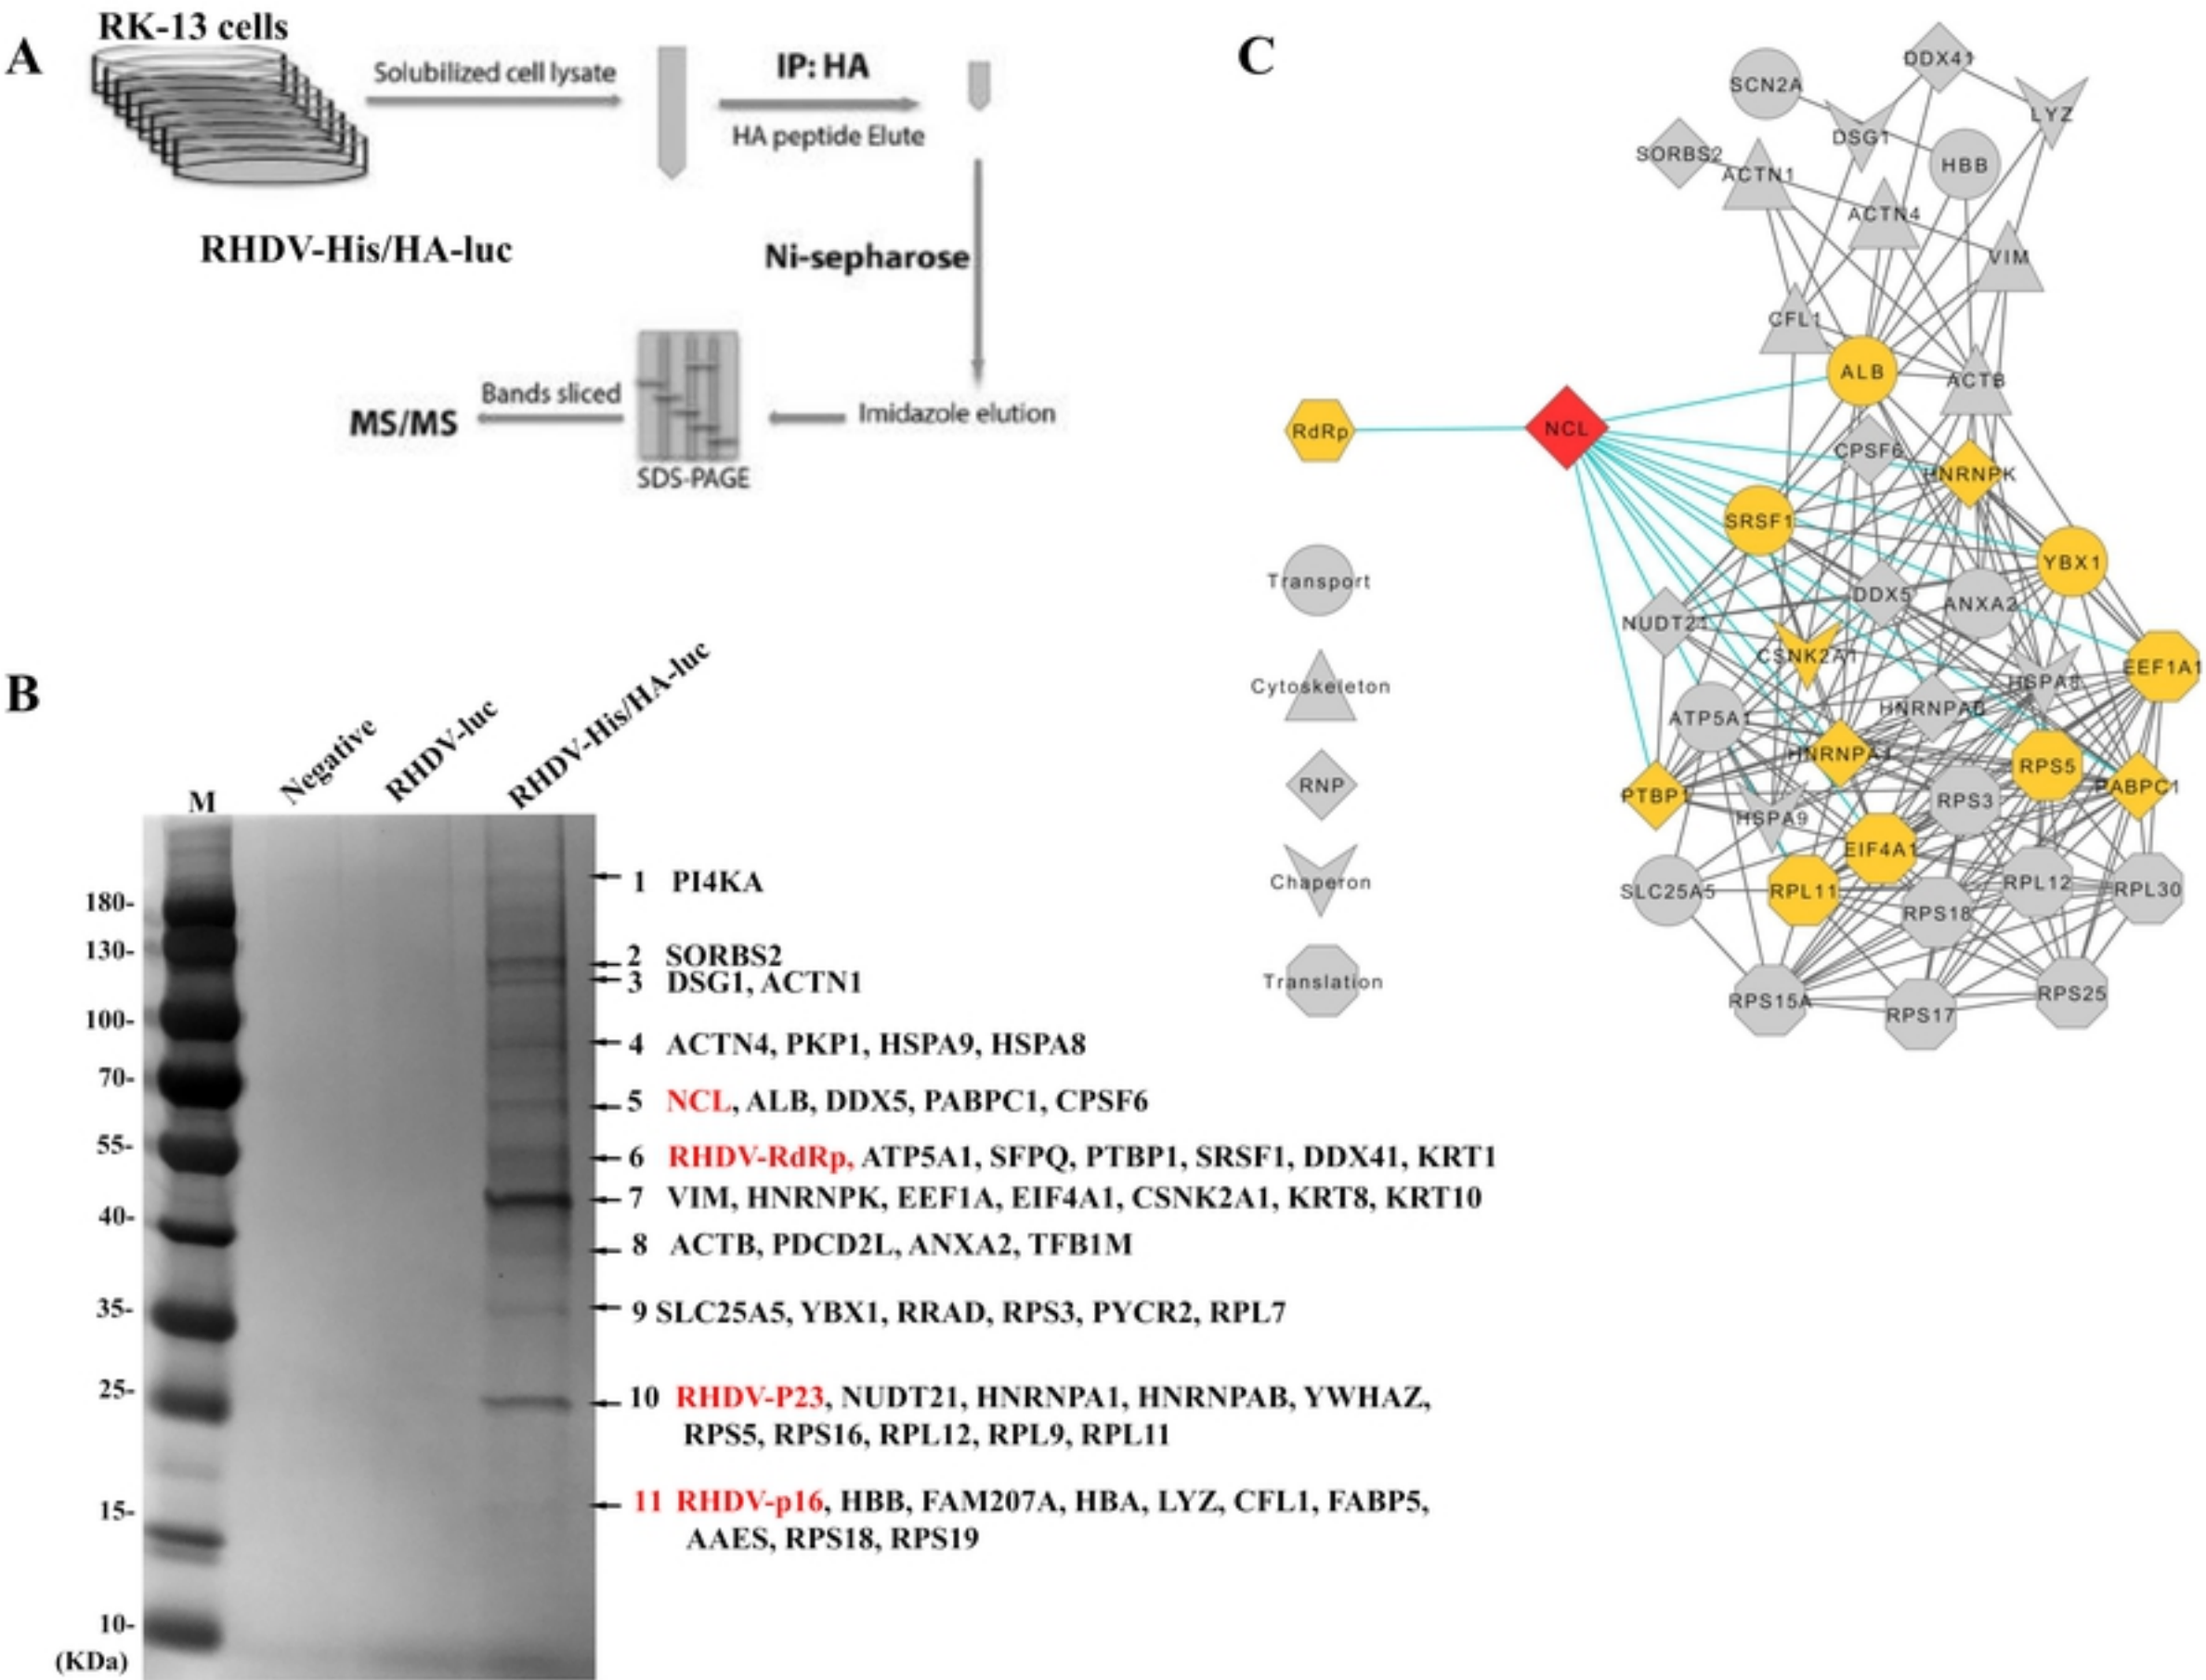

Fig 2

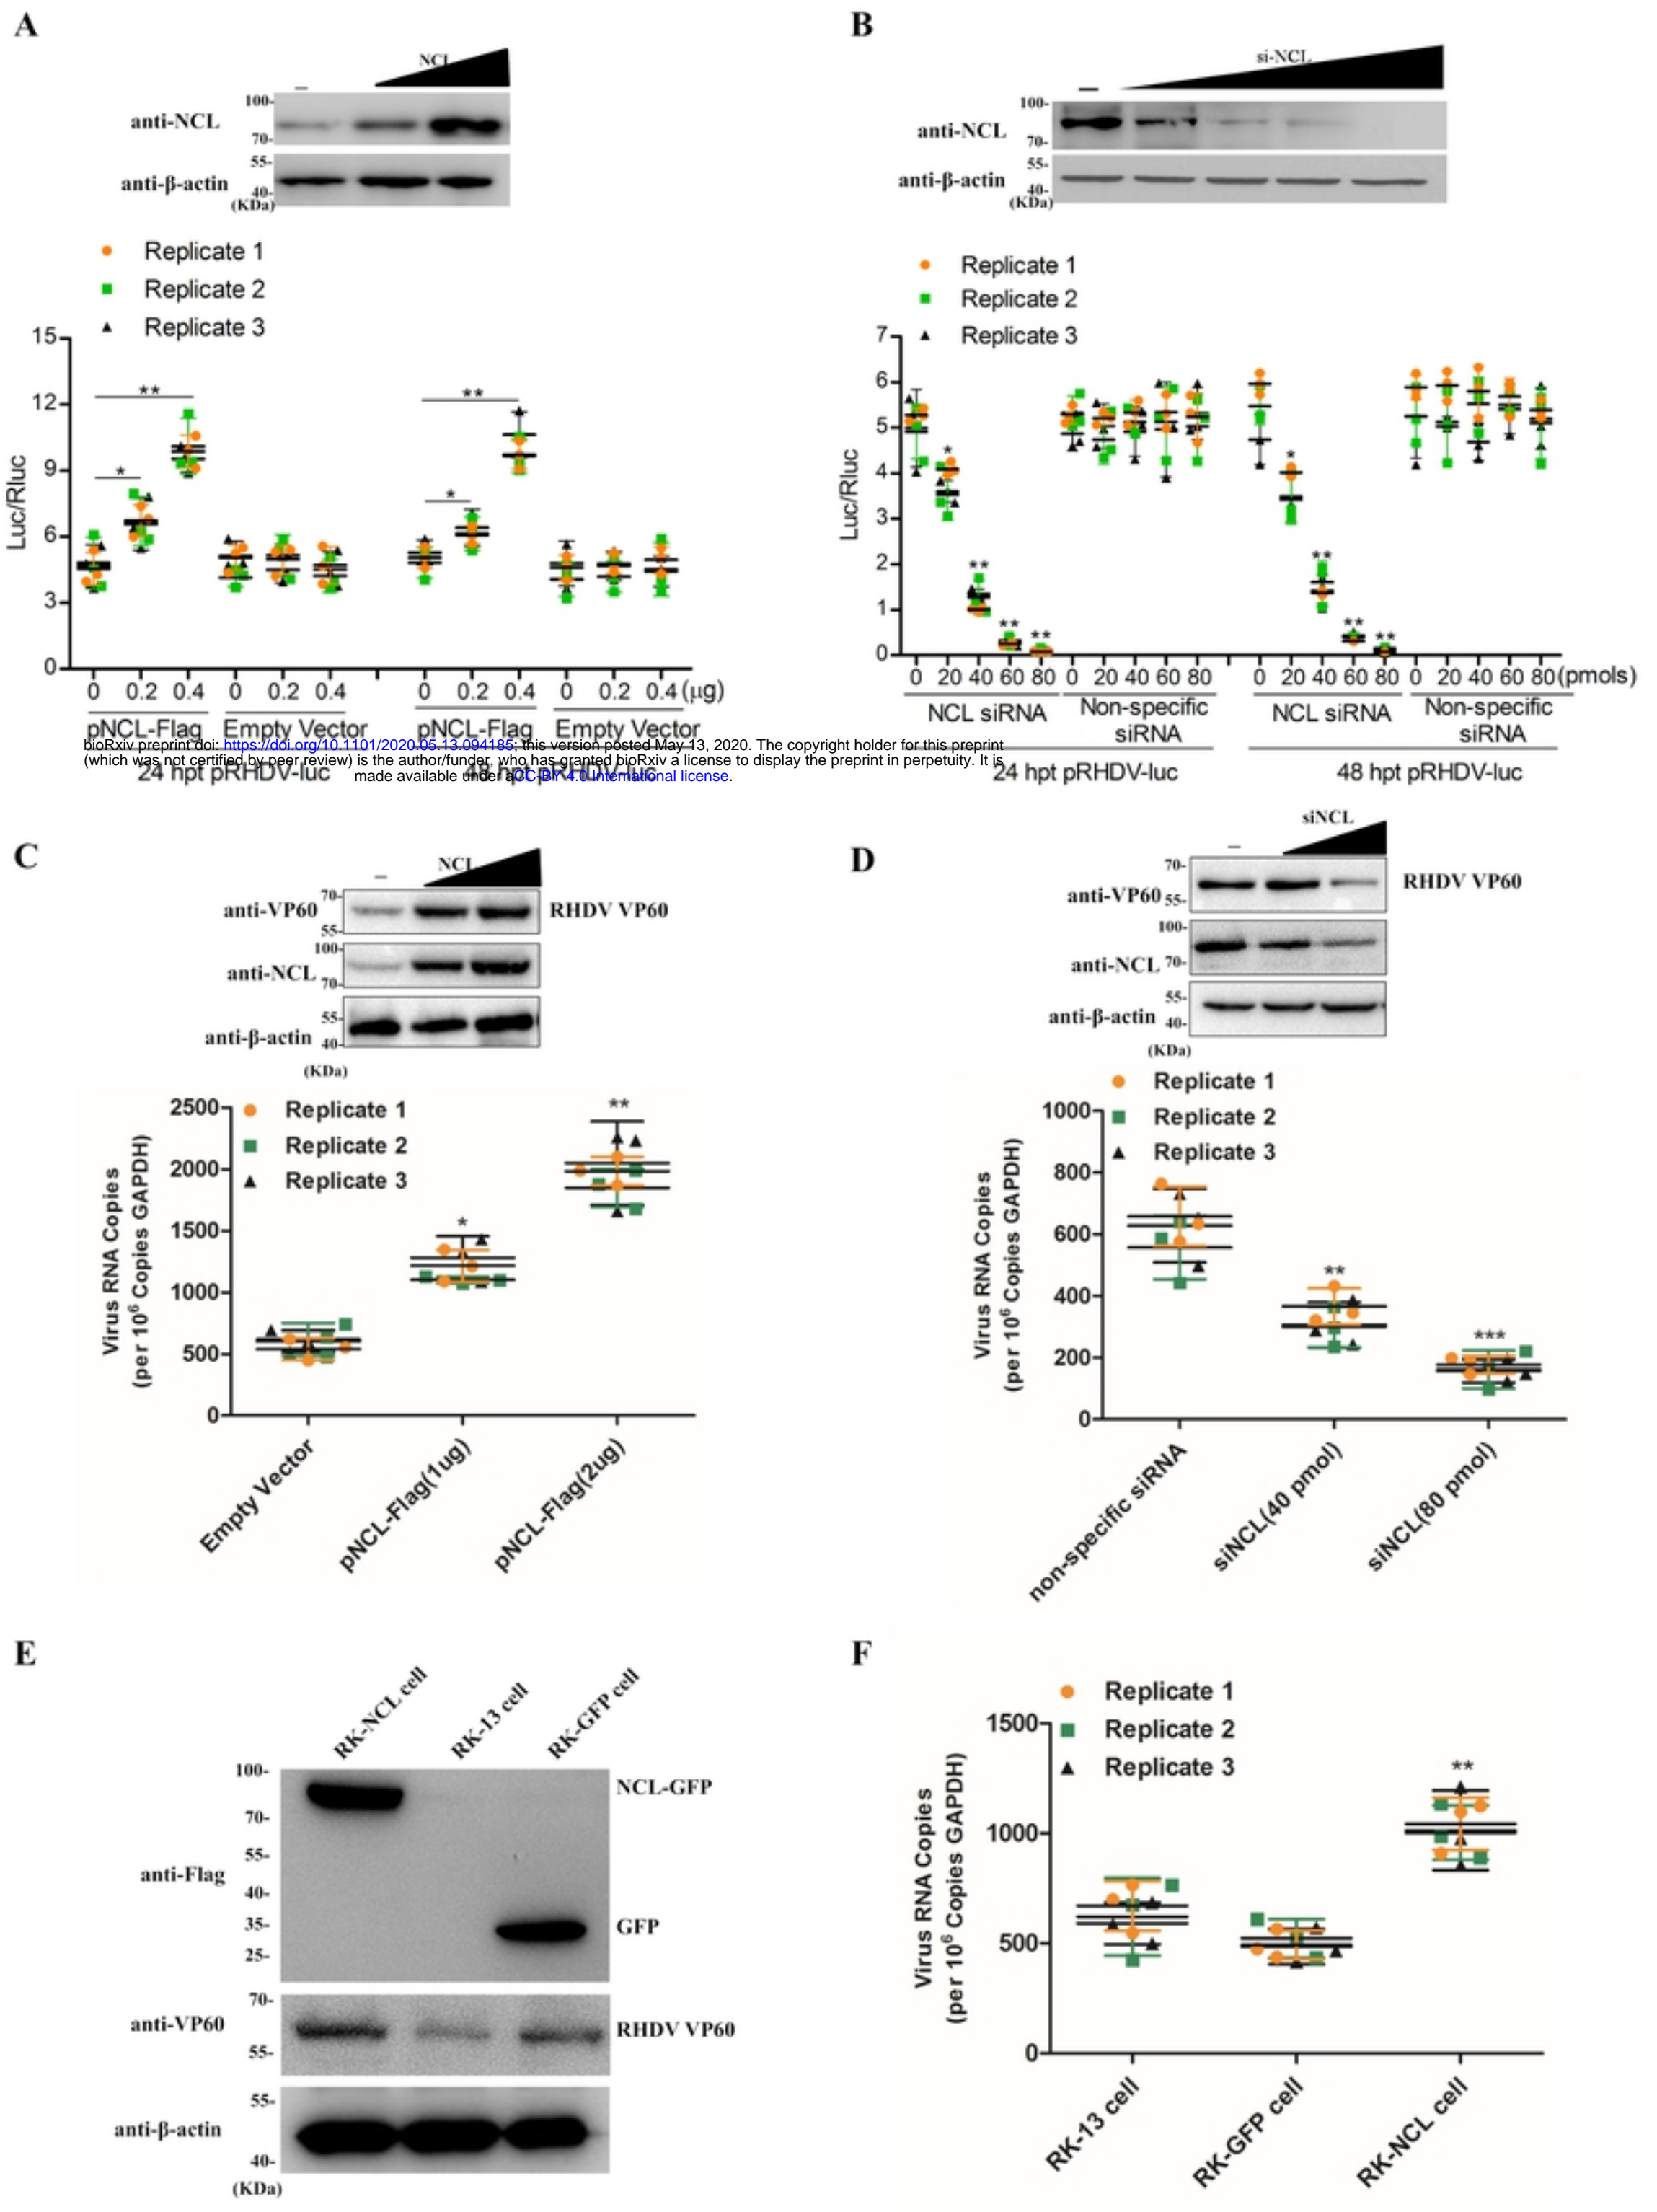

Fig 3



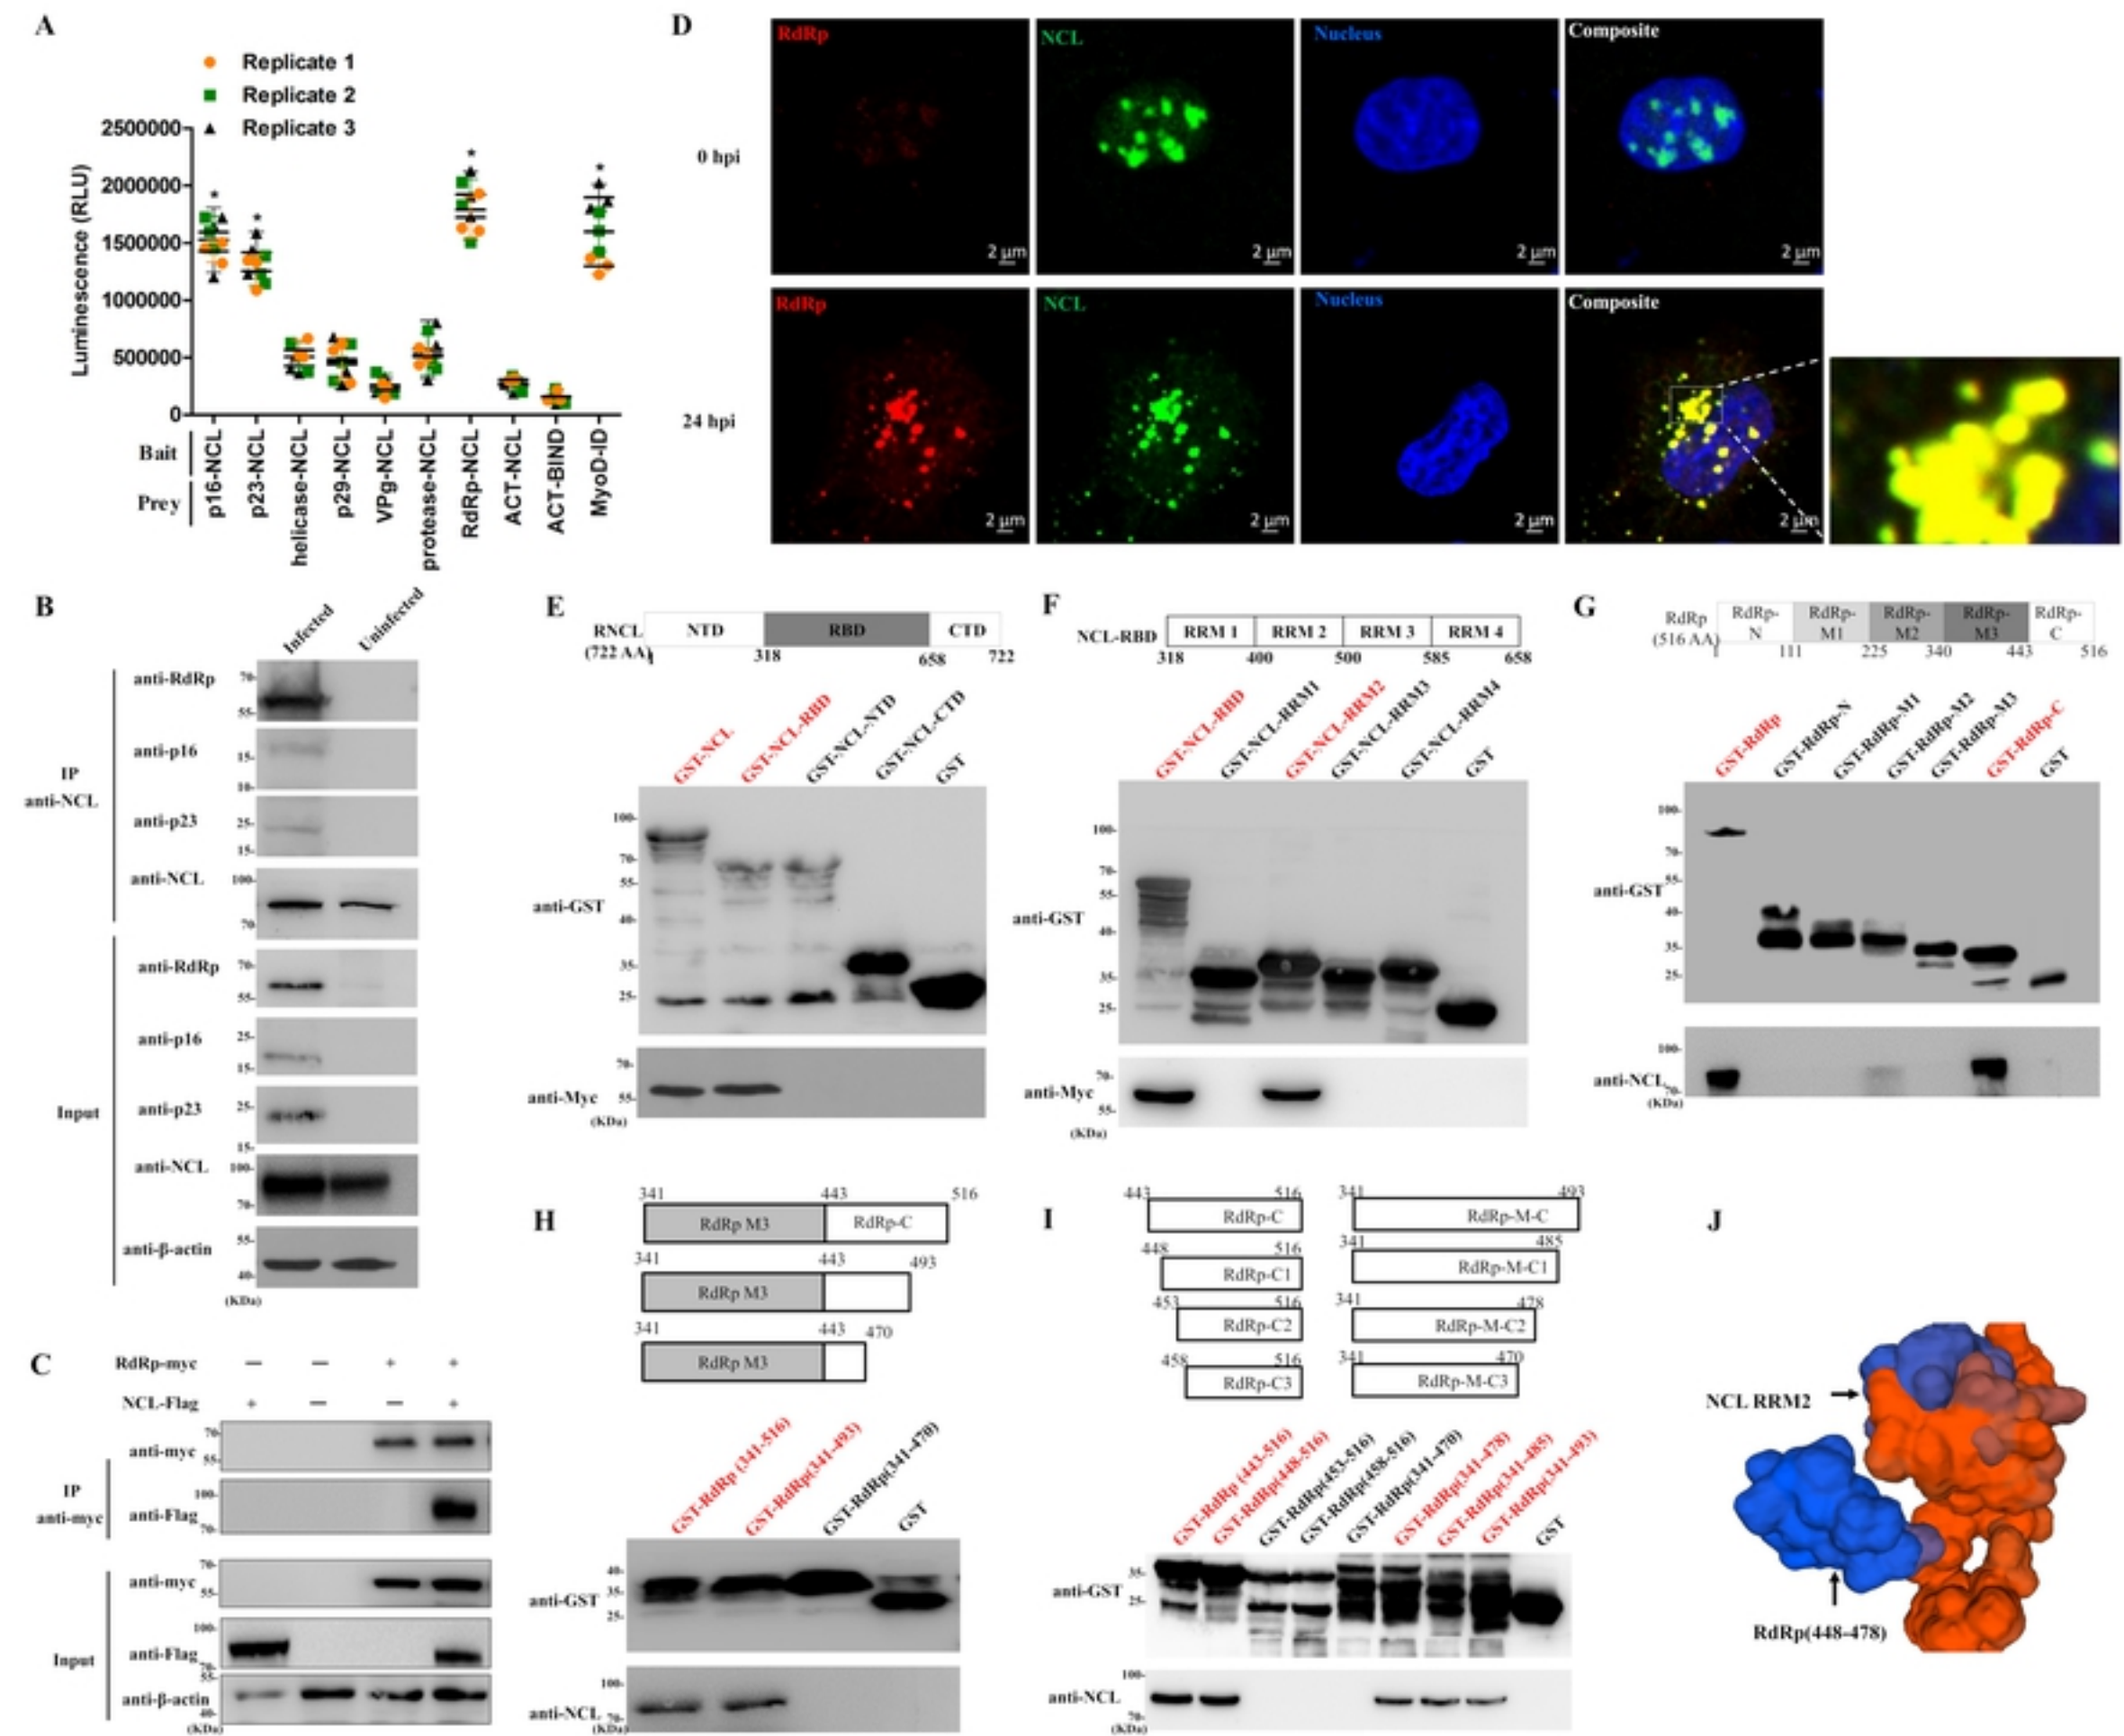

Fig 4

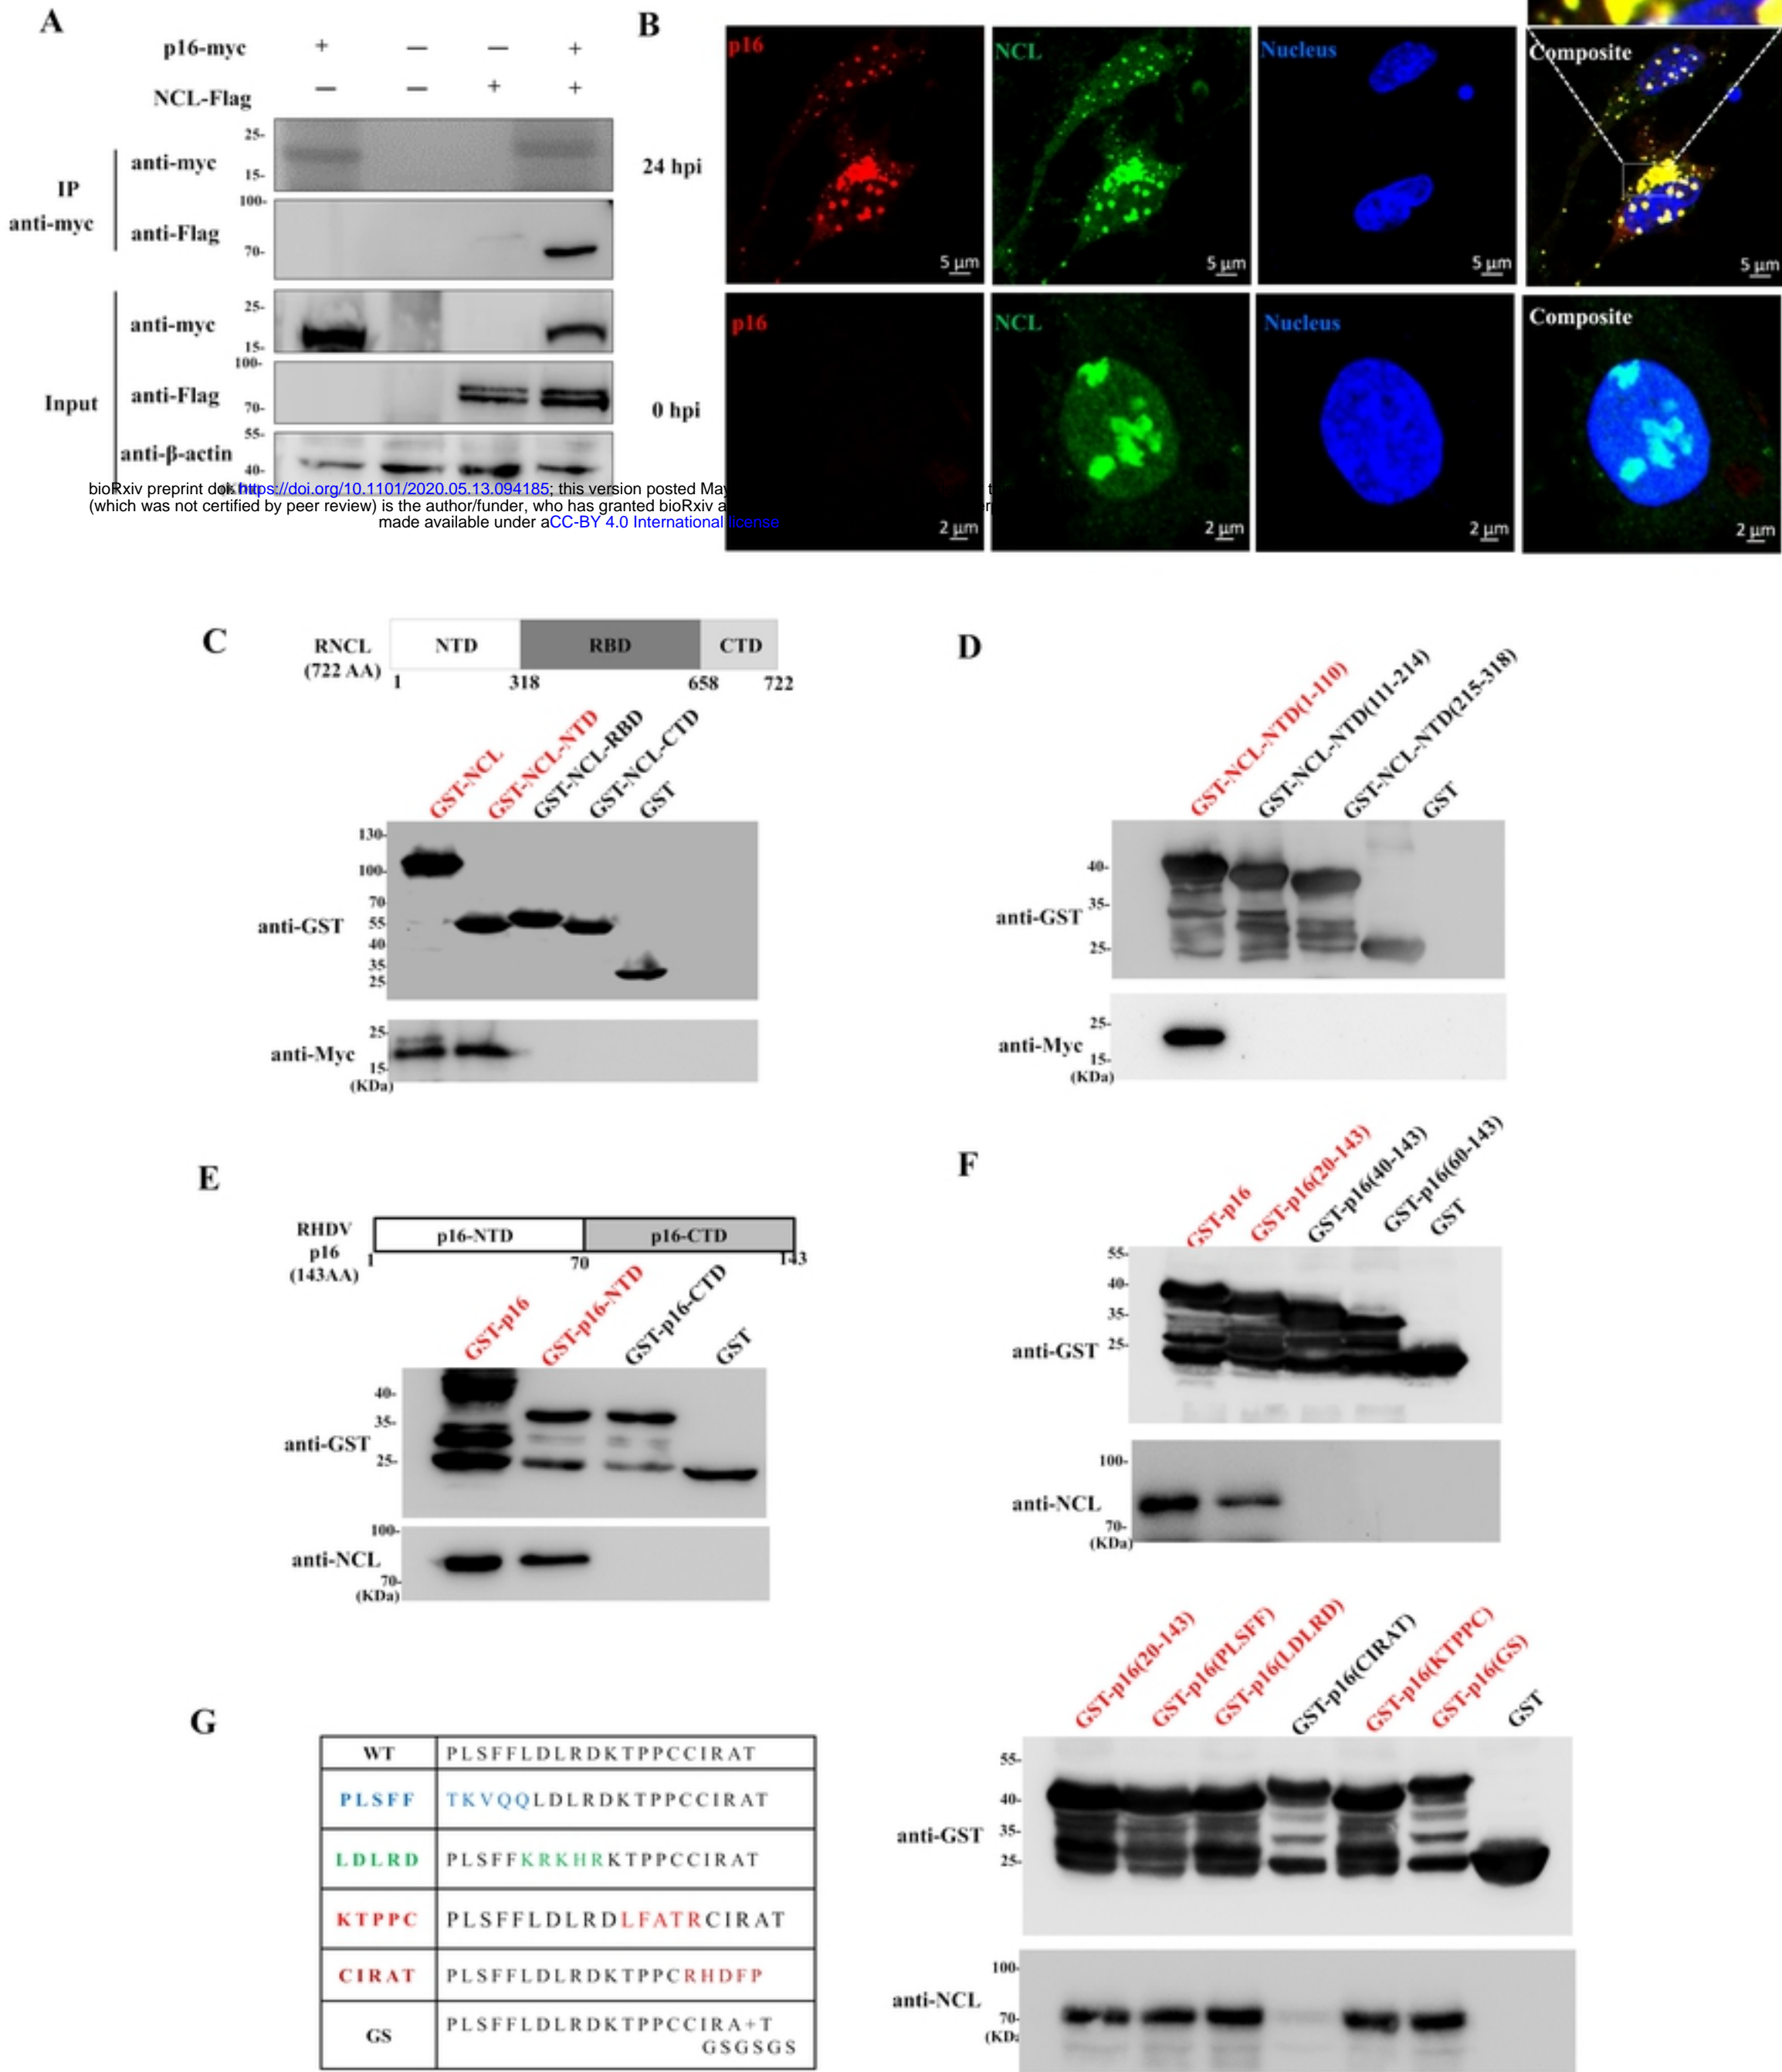

Fig 5

bioRxiv preprint doi: <https://doi.org/10.1101/2020.05.13.094185>; this version posted May 13, 2020. The copyright holder for this preprint (which was not certified by peer review) is the author/funder, who has granted bioRxiv a license to display the preprint in perpetuity. It is made available under aCC-BY 4.0 International license.

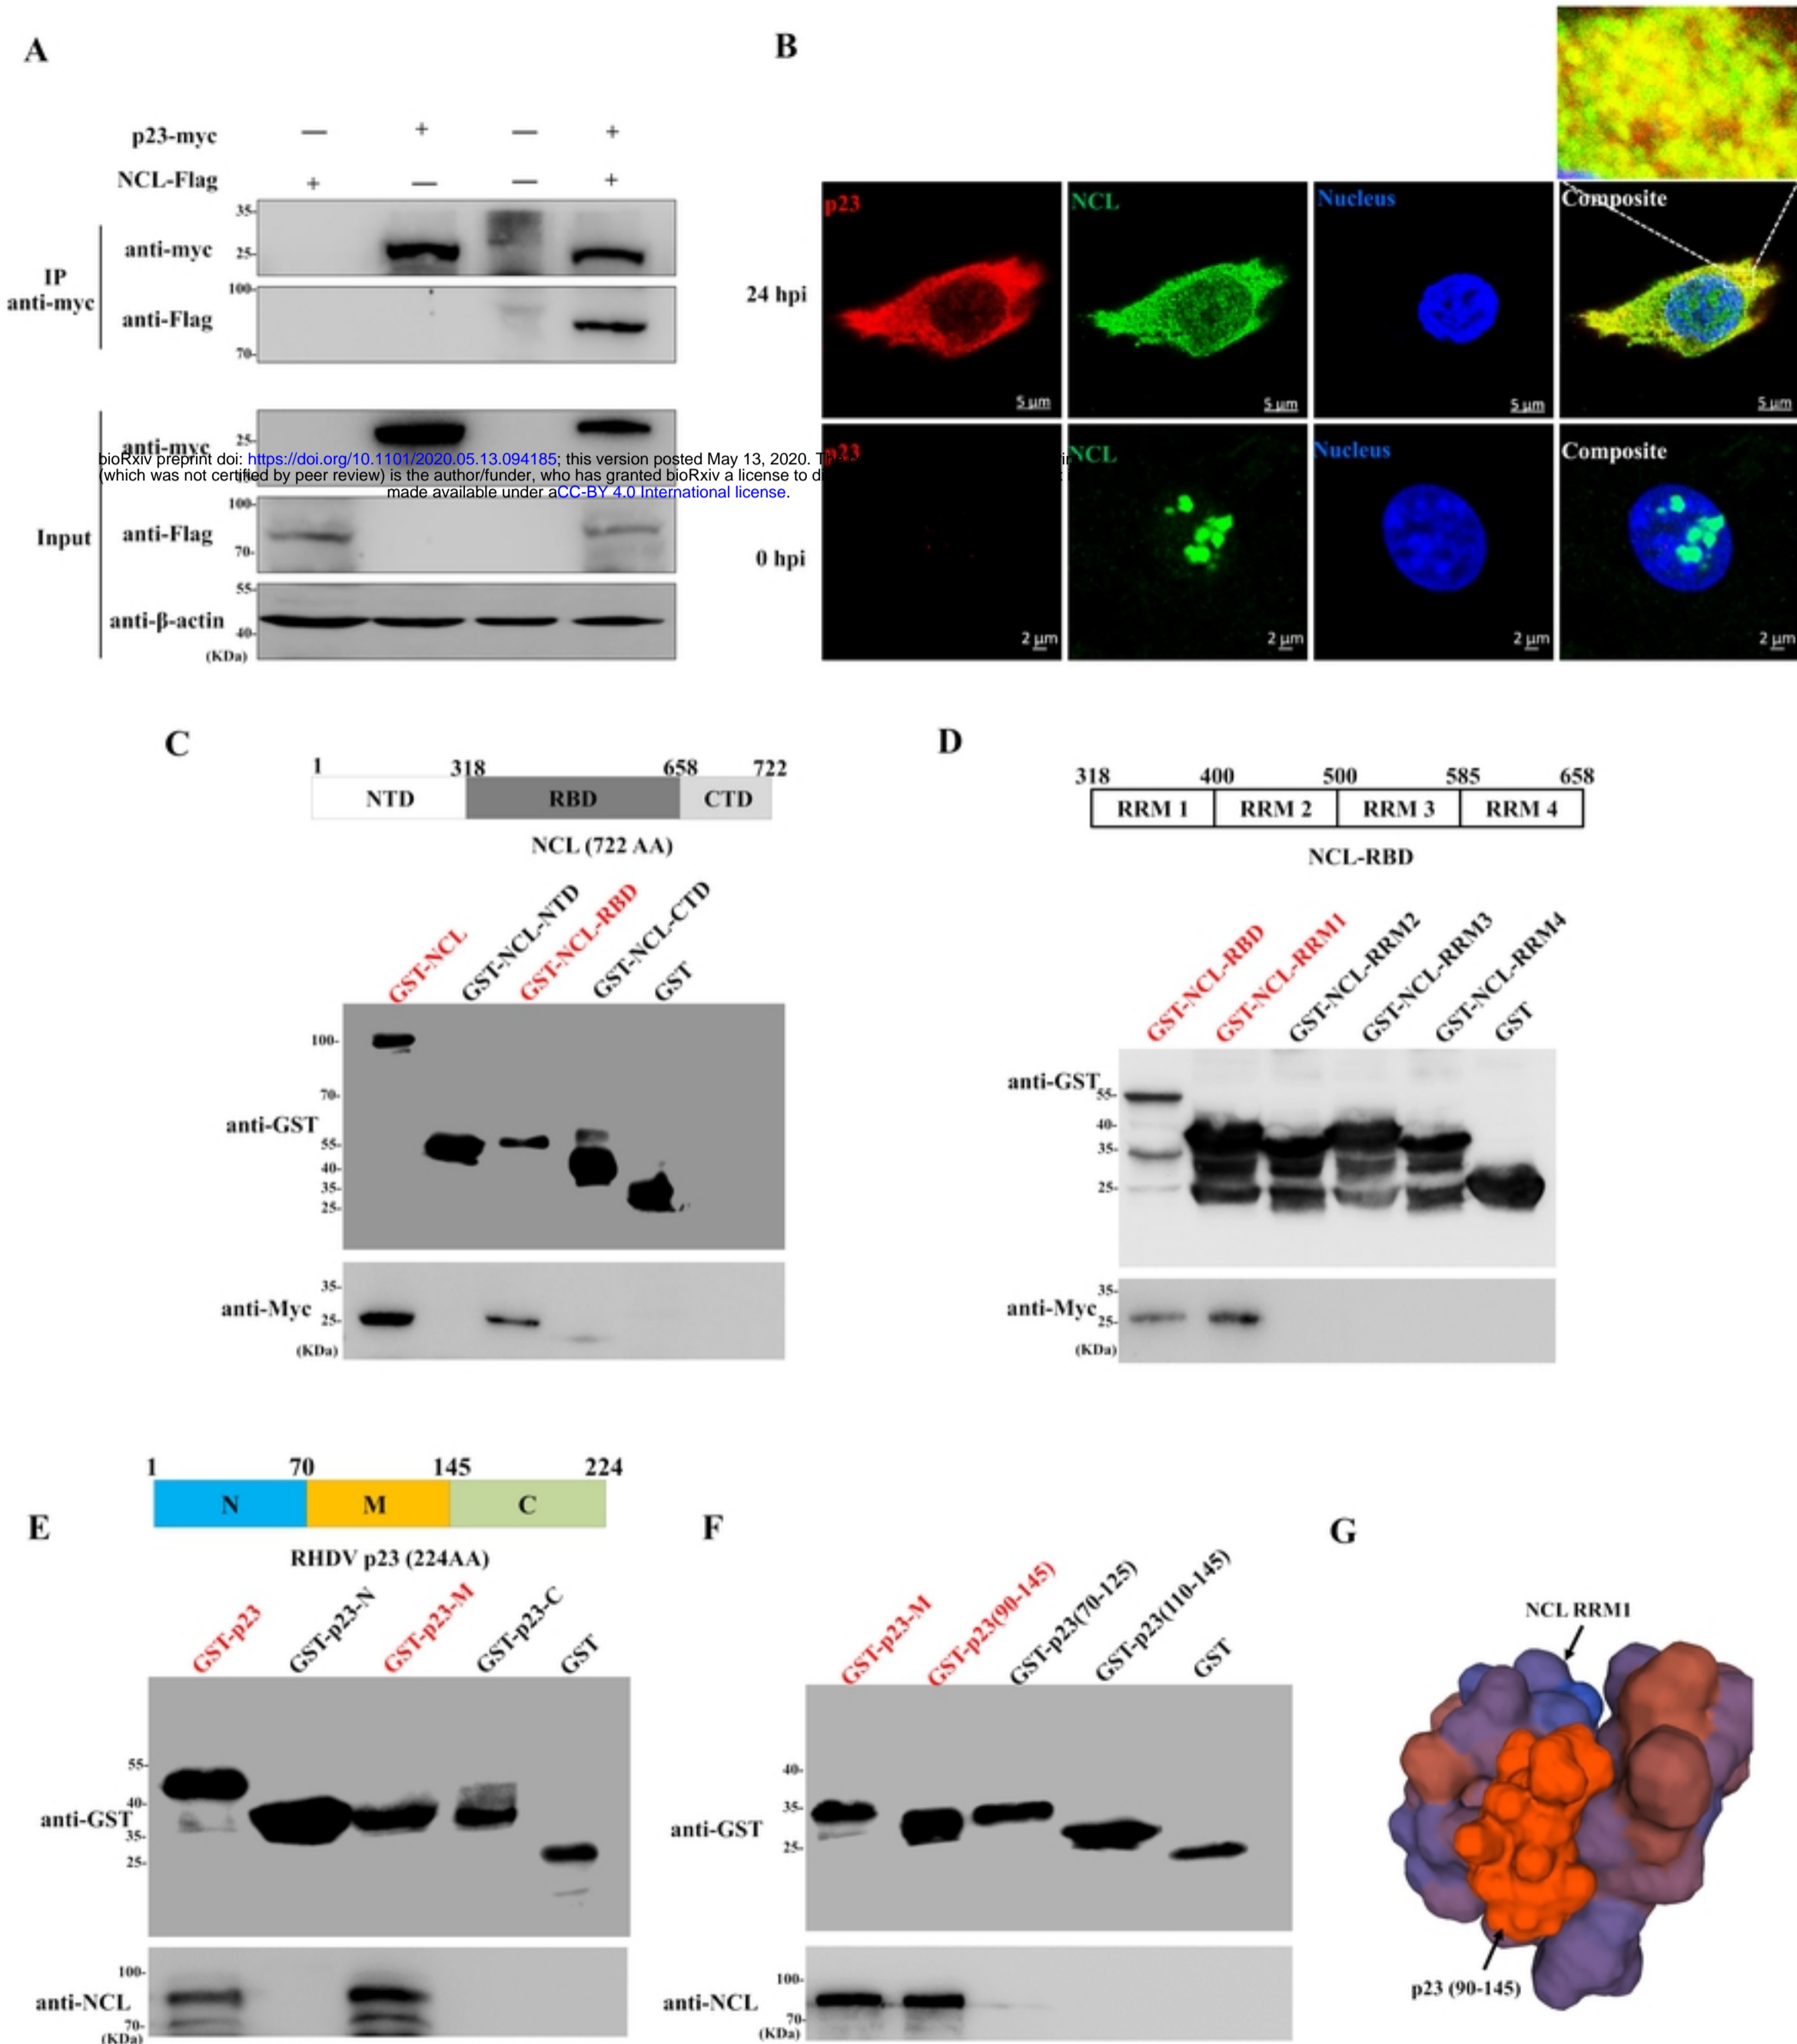

Fig 6

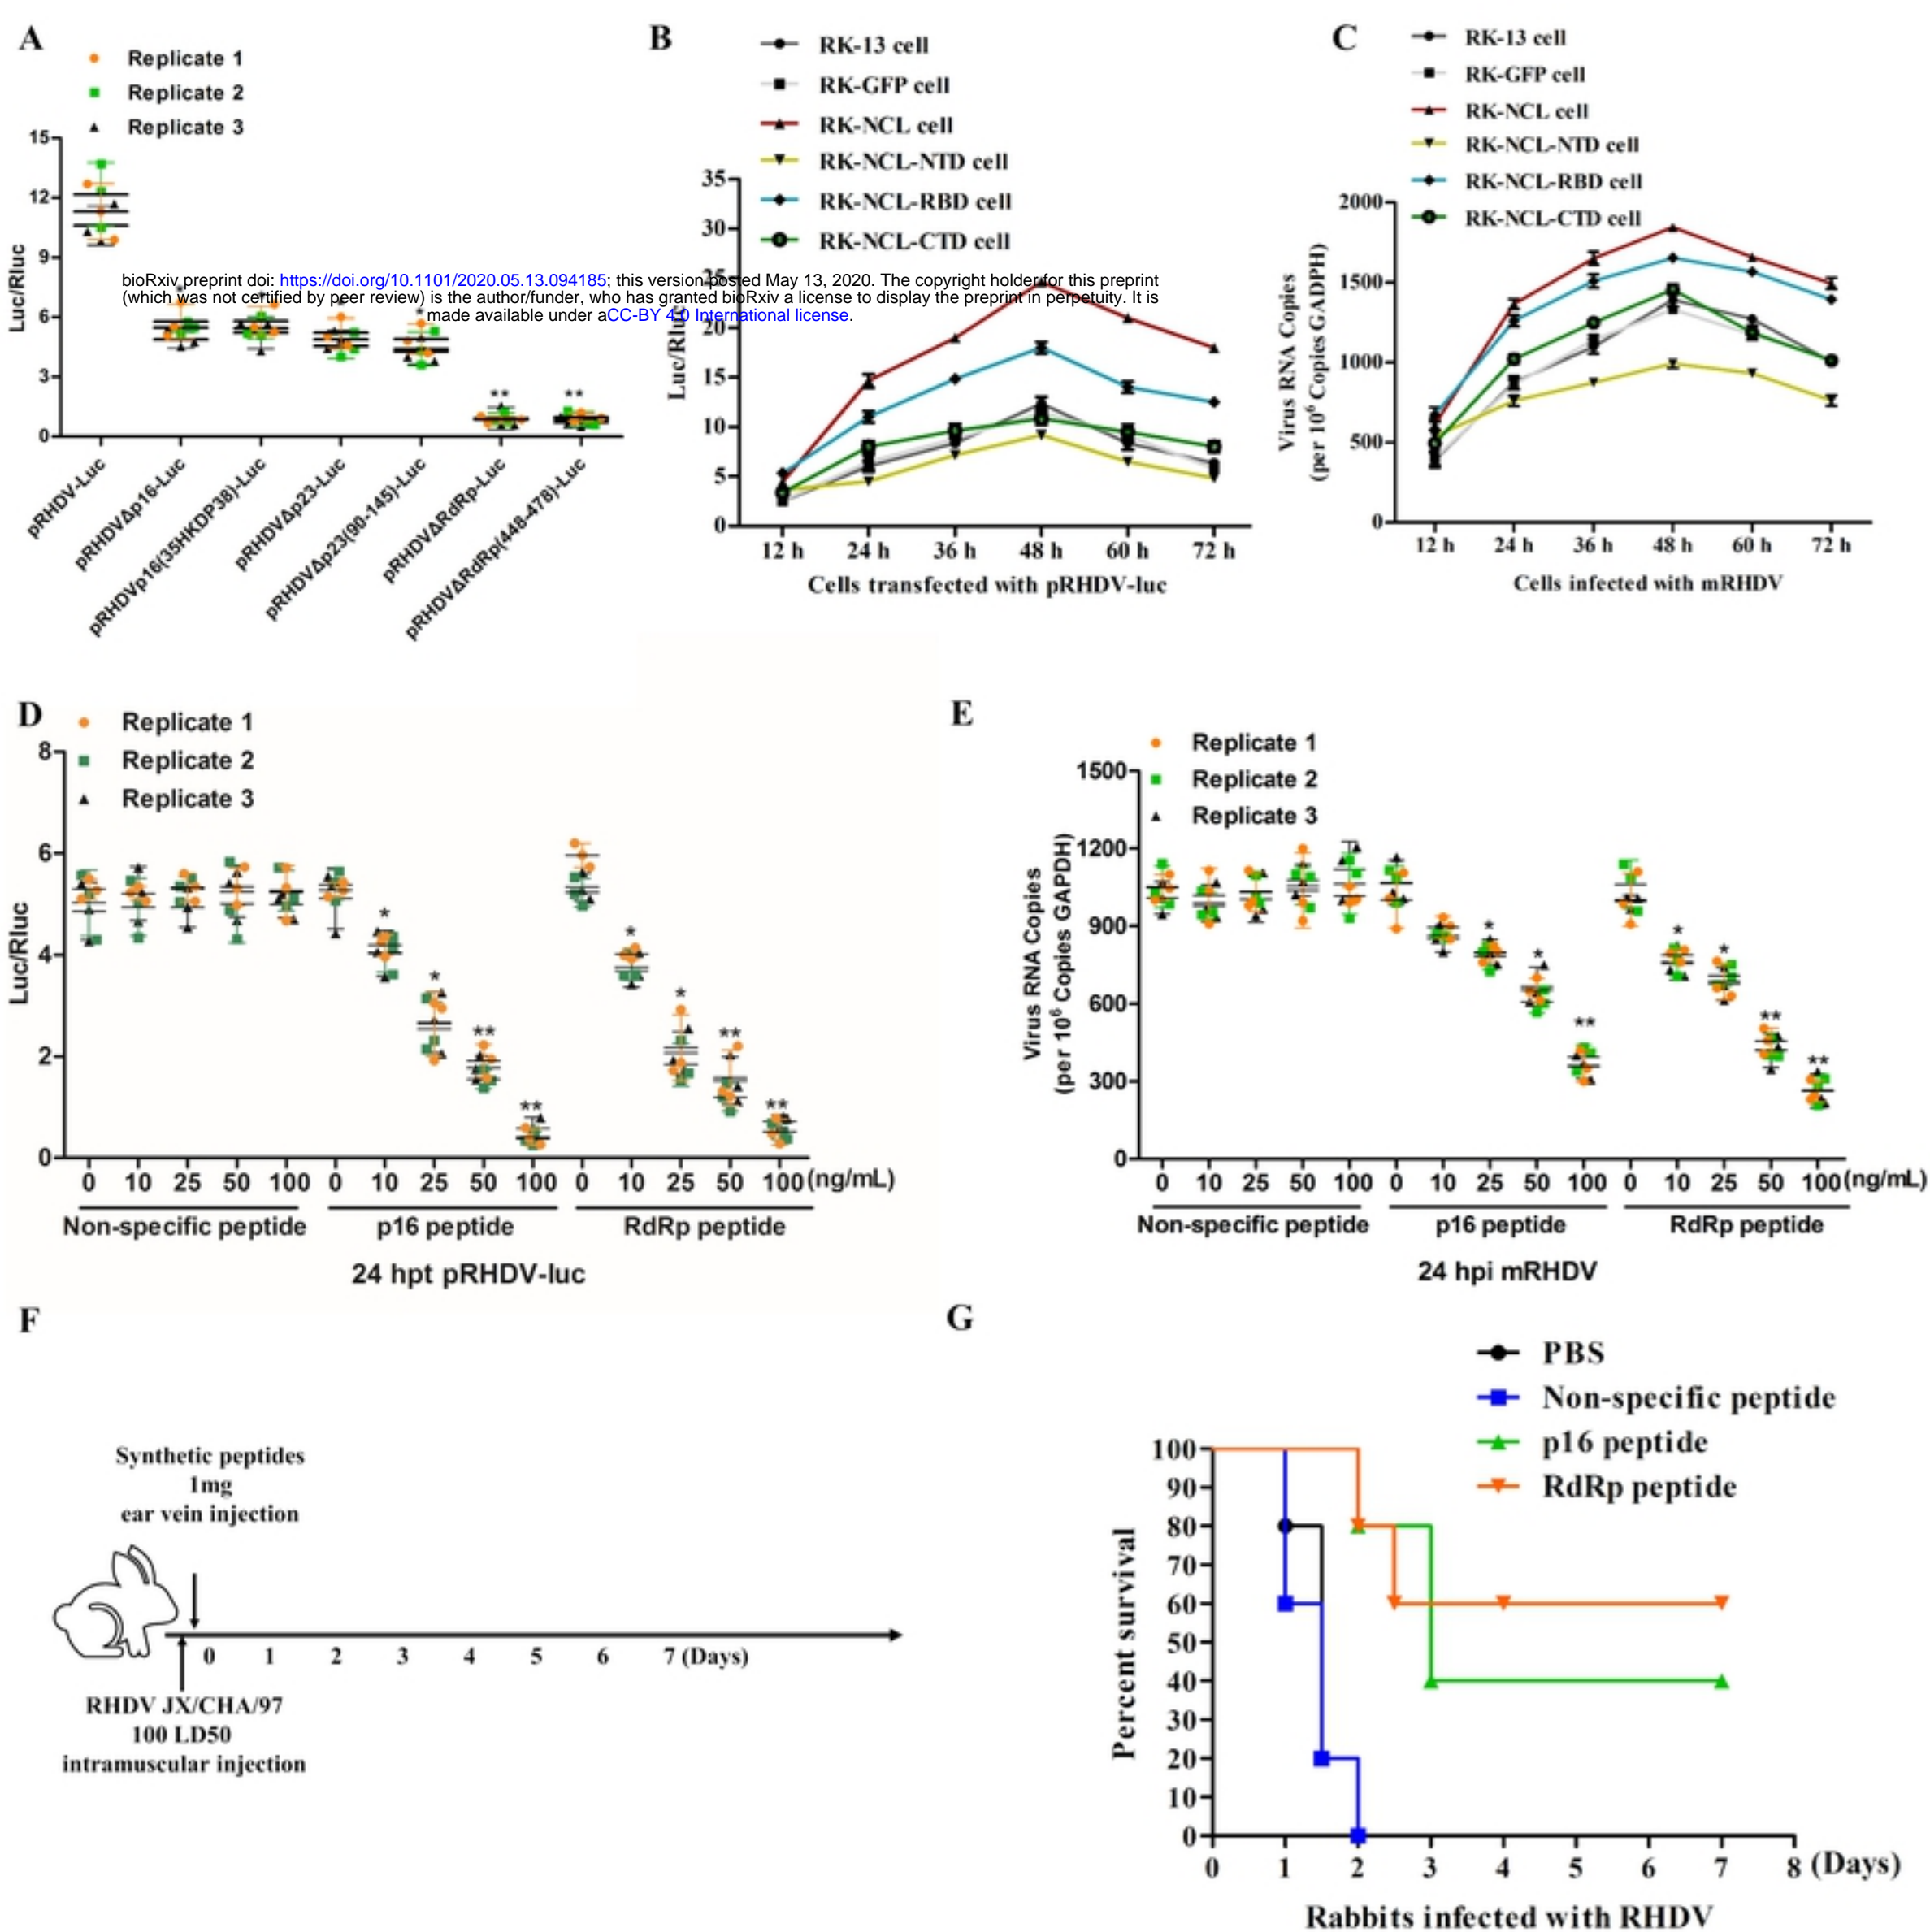

Fig 7

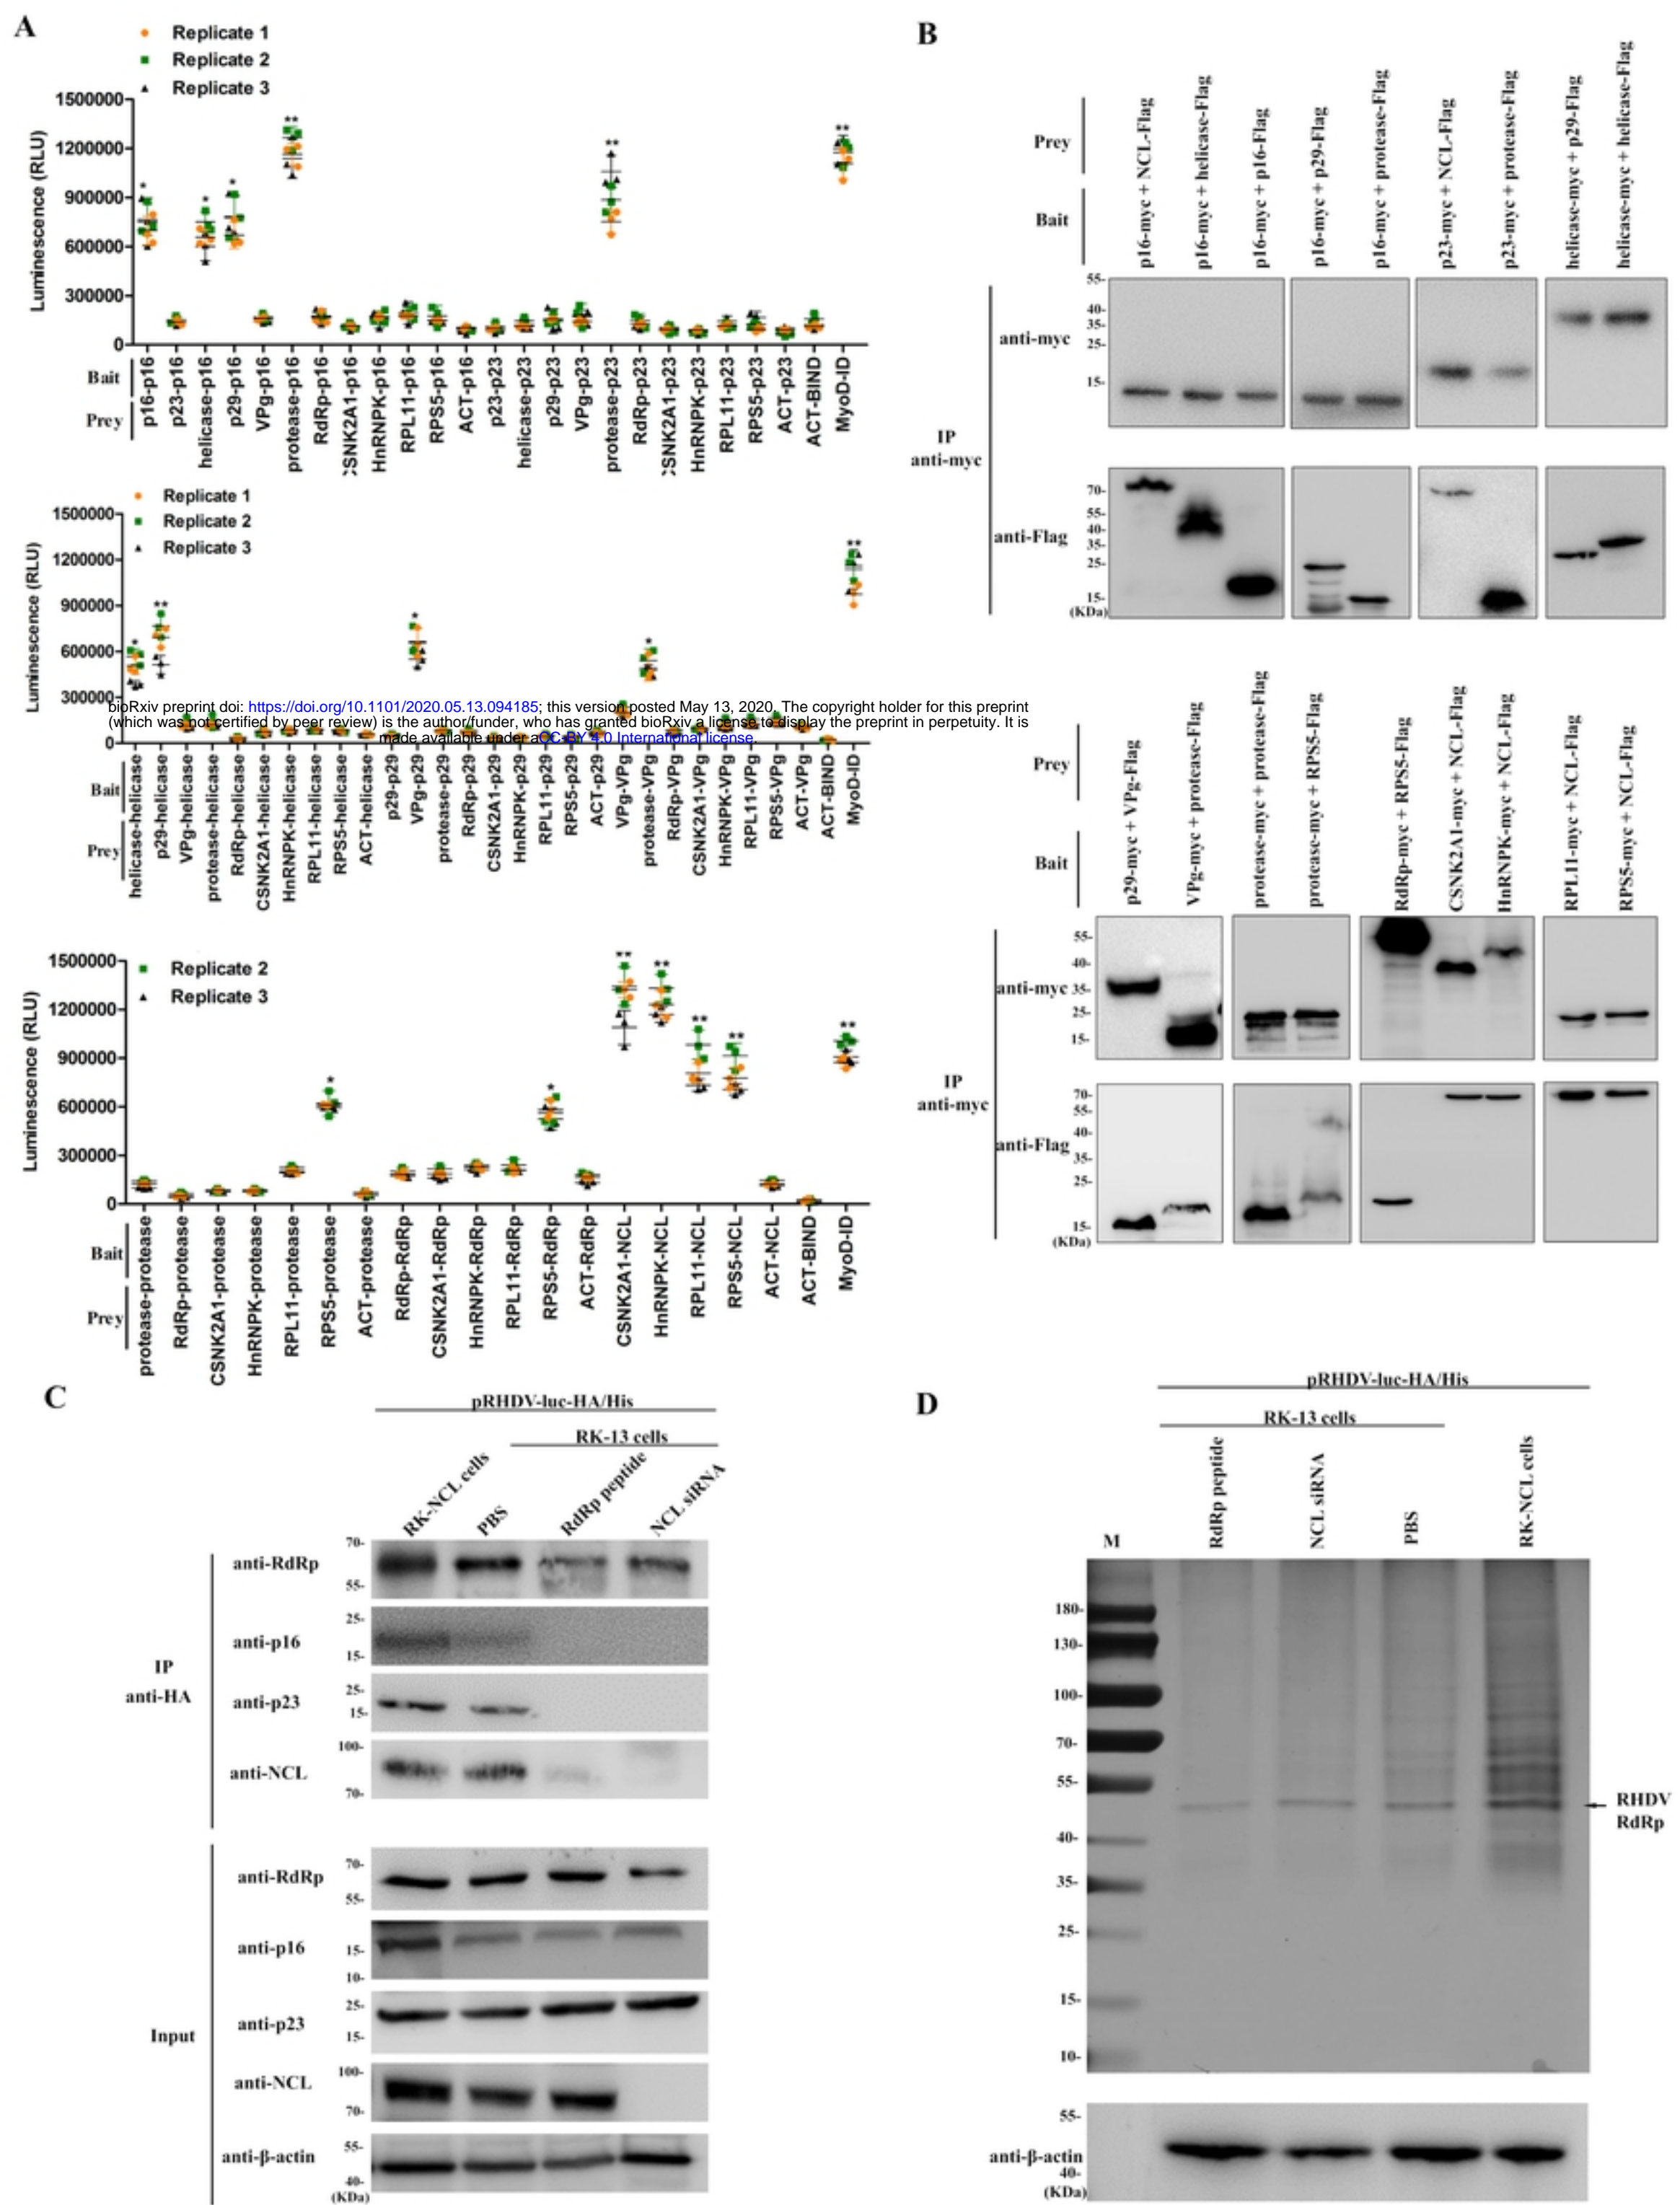

Fig 8

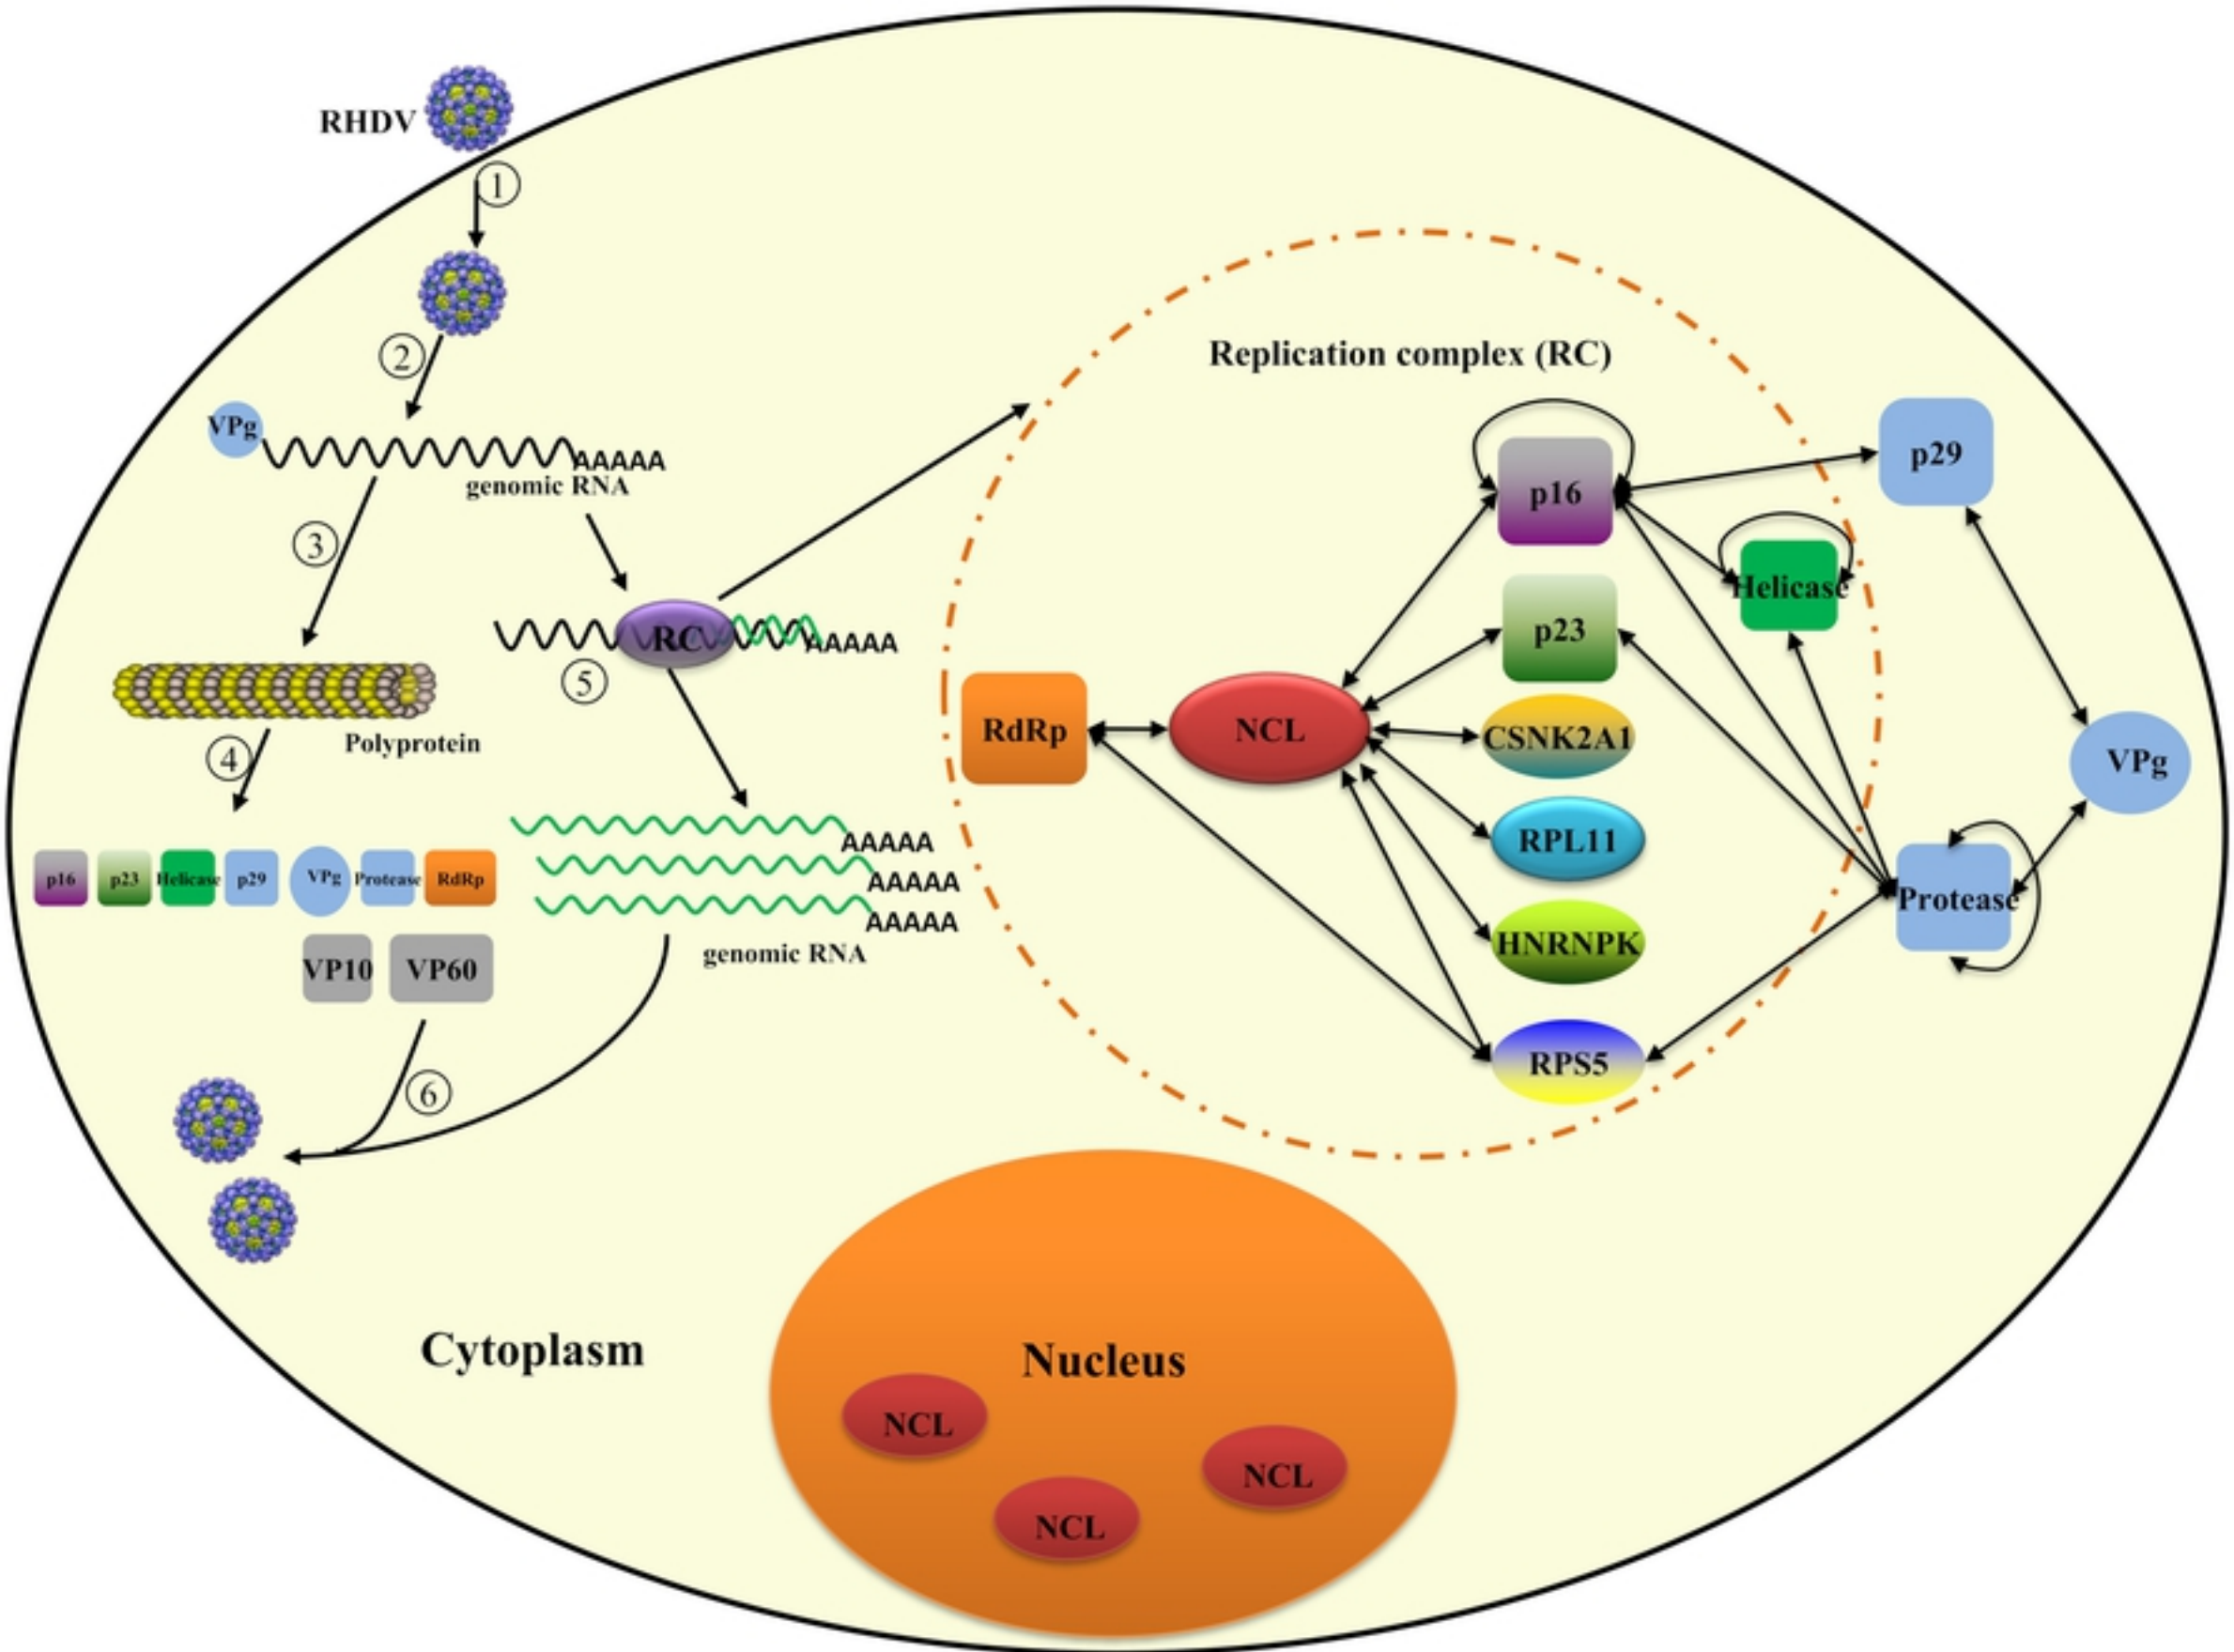

Fig 9
